# Supplementary material for: The genomes of ancient date palms germinated from 2,000 y old seeds
Source: PubMed Central journal article supplement — Proc Natl Acad Sci U S A. 2021 May 3;118(19):e2025337118. doi: 10.1073/pnas.2025337118 (PMC8126781; doi:10.1073/pnas.2025337118), 2021-05-03
Supplement: pnas.2025337118.sapp.pdf [file pnas.2025337118.sapp.pdf]

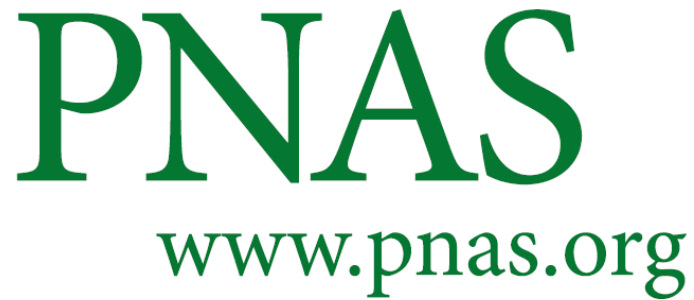

**Supplementary Information for**

The genomes of ancient date palms germinated from 2,000-year-old seeds

Muriel Gros-Balthazard, Jonathan M. Flowers, Khaled M. Hazzouri, Sylvie Ferrand, Frédérique Aberlenc, Sarah Sallon, Michael D. Purugganan

Michael Purugganan  
Email: [mp132@nyu.edu](mailto:mp132@nyu.edu)

**This PDF file includes:**

Supplementary text  
Figures S1 to S10  
Tables S1 to S8  
SI References

**Other supplementary materials for this manuscript include the following:**

Datasets S1 and S2

## Supplementary Information Text

**Sampling.** The seven ancient Judean date palm accessions originate from the germination of ancient date palm seeds collected during archaeological excavations of three sites in the Judean desert (1, 2). The seeds and seed shell fragments collected in the potting soil after germination were radiocarbon dated with ages ranging from the 4<sup>th</sup> century BCE to the 2<sup>nd</sup> century CE (Table 1). Full explanation on the provenance of the seeds, the germinating protocol and the radiocarbon dating may be found in Sallon *et al.* 2020, 2008 (1, 2). The genomes of the ancient Judean date palms were compared to whole genome re-sequencing data of 110 contemporary *Phoenix dactylifera* and other wild *Phoenix* species that we have previously published [Table S1] (3–5). Were included: 18 *P. theophrasti*, 8 *P. sylvestris*, 3 *P. atlantica*, 6 *P. canariensis*, 1 *P. reclinata*. We note that *P. atlantica* likely represents feral date palms rather than a distinct species (6).

**Library preparation and genome re-sequencing.** Genomic DNA was extracted from leaf tissue as explained in Sallon *et al.* 2020 (2). Libraries (2 x 100 paired-end) were constructed with Nextera library preparation protocols and sequenced on an Illumina HiSeq 2500 system according to the manufacturer's protocols.

**Read processing and genome alignment.** Reads were demultiplexed and those passing Illumina quality control filters were processed with Trimmomatic (7) v. 0.39 to remove contaminating adapter sequences. For adapter removal, we used the adapter and Nextera transposase sequence database included with Trimmomatic (v. 0.39) downloaded with the following setting ILLUMINACLIP:<adapter library>:2:30:10 and only reads pairs where both reads in a pair were 76 bp or longer following trimming were retained for subsequent steps.

We aligned reads to the reference genome from Hazzouri *et al.* 2019 (8). This genome is a PacBio/Illumina genome assembly from a male date palm from a fourth-generation backcross (BC4) with a female of the Barhee cultivar. Its size is ~772 Mb and it contains 18 primary contigs (49.9% of total length) along with 2,371 unplaced contigs. The nuclear and chloroplast genomes were combined to form a single modified reference sequence that was used in all subsequent steps.

Processed reads were aligned to this unmasked genome using bwa mem (9) v. 0.7.15-r1140. The bwa mem aligner was run with the -M option to mark supplementary reads (0x800 bitwise flag) as secondary (0x100). Sample alignments were processed with SamSort from Picard-tools (10) v. 2.8.2 to coordinate-sort the alignments. We used MarkDuplicates (Picard-tools) to flag duplicate read pairs. Processed alignments were summarized with samtools v. 1.9 (11) using the stats option.

**Variant calling and SNP filtering.** SNP-calling and genotyping was performed with the GATK v. 3.5-0-g36282e4 HaplotypeCaller (12) run in GVCF mode followed by joint-genotyping with GenotypeGVCFs. Reads were filtered from the HaplotypeCaller step to exclude those with a mapping quality <10 and to exclude those marked as secondary alignments. This approach yielded 47,035,054 variants across all 117 samples.

These variants were filtered using GATK v4.0.2.1. We restricted analysis to the non-repetitive fraction of the genome assembly by excluding SNPs in repetitive regions identified during the annotation of the genome assembly (8). Additional SNP filtering was conducted by applying hard filters to the raw variants. We excluded multi-allelic SNPs and SNPs within 6 bps of indel polymorphisms. For further filtering, thresholds were determined following Flowers *et al.* 2019 (4) from which most of our data come from. Flowers *et al.* 2019 (4) determined thresholds by considering GATK guidelines, considering the impact of thresholds on the transition:transversion ratio (13), and drawing on approaches of comparable re-sequencing studies of non-model organisms and their relatives. We tailored our filtering thresholds by filtering the raw call set to exclude SNPs with low (<585) and high depth (>2400) summed across samples. We also excluded SNPs meeting the following conditions: FS > 60.0, SOR > 3.0, QD < 8.0, MQ < 40.0, MQRankSum < - 3.0, ReadPosRankSum < -1.5, BaseQRankSum < -8.0. We filtered out genotypes having GQ < 20.0 and SNPs with a genotype call rate < 85%. This procedure yielded a filtered call set of 5,332,805 SNPs that served as the basis for subsequent analyses. Statistical analyses were conducted with the R Statistical Programming Language (14).

**Identifying DNA lesions associated with prolonged period of seed storage.** In order to identify whether some types of mutations are more prevalent in the ancient Judean date palms compared to the modern varieties, we profiled the mutation pattern of each singleton, where singletons are defined as alleles found at frequency of  $1/2N$ , where N is the sum of all date palm and wild relative samples. Using a custom Perl script, we identified singleton mutations in each accession, computed the number in each substitution class (G-to-C, A-to-C, etc.), and normalized it by the total number of singletons observed in the accession, in order to account for variation in diversity among accessions. We checked for normality within each group (modern and ancient) and for each of the six mutation classes using the *normality* function from the R package *dlookr*. Since some distributions are not normal, we used Wilcoxon rank sum tests to examine whether there is a significant difference among ancient germinated and present-day genomes in each of the six mutation type fractions (*wilcox.test* function in R).

We also examined small indels, as they could have been inserted during strand break repair at the onset of the germination process (15). We used a custom Perl script to identify, from the raw indel call set (5,341,932 indels called in all 117 *Phoenix* accessions), the singleton indels (i.e. mutations found in only one accession at a frequency  $1/2N$ , where N is the sum of all date palm and wild relative samples). We restricted our analysis to indels having the following features: QUAL  $\geq$  30, DP  $\geq$  5 and maximum missing data of 15%, and to indels found in the date palm accessions, that is a total of 99,567 indels. We tested whether there is a significant difference in small indel numbers using a multivariate Wilcoxon test implemented in the *mWilcoxonTest* function from the R package *DepthProc* v.2.1.3 (<https://www.rdocumentation.org/packages/DepthProc>).

**Population clustering and relatedness among samples.** Global patterns of individual ancestry and population structure were examined using maximum-likelihood-based clustering and principal component analysis (PCA). We estimated individual

ancestries on (i) all accessions, and (ii) date palms and *P. theophrasti* only using ADMIXTURE (16) v. 1.3.0. We used 53,845 randomly sampled SNPs and default parameters. The optimization method was a block relaxation algorithm and the termination criterion was to stop when the log-likelihood increases by less than  $\epsilon = 10^{-4}$  between iterations. We ran the PCA on date palms and *P. theophrasti* accessions using genotype calls with the PCAdapt (17–19) *R* package v. 4.3.3, using a subset of randomly sampled SNPs and further filtered out SNPs with minor allele frequencies below 5%, resulting in 24,689 SNPs.

We generated maximum-likelihood trees of *Phoenix* spp. accessions using RAXML-NG (20) v. 0.9.0 and a randomly downsampled SNP set including 1% of our full SNP set (53,845 SNPs). The VCF file was converted in PHYLIP format using the python script `vcf2phylip.py` (21). The command `raxml-ng -parse` was run to compress the PHYLIP format file into the binary format used by RAXML-NG. We then performed 20 maximum-likelihood tree searches using 10 random and 10 parsimony-based starting trees. The log likelihood of the 20 tree searches ranged between -1,909,270.82 and -1,908,426.36, and thus had low variability indicating that all runs converge toward the same likelihood maxima despite different starting trees. We picked the best-scoring topology and checked the robustness of the tree by performing 100 bootstrap replicates using the same software. We rooted the tree with *P. reclinata* and made the plot using the *R* package `treeio` (22). We repeated a similar tree inference after exclusion of the North African date palms from the alignment, leading to an alignment containing 97.79% of informative sites. As before, the log likelihood varies only slightly across the 20 searches, from -1,423,671.29 to 1,423,389.26 and we picked the best-scoring topology and performed bootstrap analysis with 100 replicates.

**Individual and population statistics.** We calculated for each date palm and *P. theophrasti* accession the level of heterozygosity using VCFtools v 0.1.14 (23) in non-overlapping sliding windows of 5 kb. We calculated the mean for each accession across each window and reported for each population the mean  $\pm$  standard error. We tested whether there was significant difference in heterozygosity among populations with Wilcoxon rank sum tests using `wilcox.test` function in *R* (14), after finding that distributions within each population are not normally distributed (using `shapiro.test` function).

Further, the level of polymorphism was calculated in each population or species using a custom perl script calculating the number of polymorphic sites in each group. We then identified private polymorphisms using a custom perl script that count each SNP segregating for an allele (“private allele”) that is restricted in its distribution to a particular focal population or species in our analysis. For this analysis, we removed admixed samples, as identified using the ADMIXTURE analysis, namely PDAC64, PTHE2, PTHE3, PTHE4, PTHE26, PTHE27, PSYL7 and PSYL44. We further identified private fixations as alleles observed at 100% frequency in the focal population or species, but not observed in the non-focal set.

**Admixture tests and ancestry proportions.** We tested for the presence and extent of admixture between *Phoenix* populations/species using the *R* package `admixr` (24) v.0.9.1.9000, which provides an implementation of ADMIXTOOLS (25). We used a

script available online to generate the input in EIGENSTRAT format from our VCF (<https://github.com/joanam/scripts/blob/master/convertVCFtoEigenstrat.sh>). We ran the tool using the full SNP set after filtering out regions associated with sex determination (see above). We focused on determining whether the Judean date palms show evidence of gene flow with *P. theophrasti* as evidenced in North African cultivars (4), or with *P. sylvestris*. Computing the below admixture statistics require the understanding of the relationships between populations and species. This phylogenetic tree shows that *P. theophrasti* is sister to the date palm (Fig. S6a), rather than *P. sylvestris* as previously reported (4). Nonetheless, we believe this pattern is driven by North African date palms being introgressed by *P. theophrasti*. To test this hypothesis, we generated a phylogenetic tree after excluding the North African samples. The resulting tree (Fig. S6b) shows that *P. theophrasti* is indeed an outgroup to both *P. dactylifera* and *P. sylvestris* in agreement with our previous report (4).

We calculated Patterson's  $D$  (25, 26) also known as the ABBA-BABA test. The implementation of the test in *admixr* requires a rooted and asymmetric four population tree in the form  $((W, X), Y), Z$ , where  $Z$  is an outgroup to a clade formed by  $W, X$  and  $Y$ , and  $Y$  is an outgroup to a clade formed by  $W$  and  $X$ . The test is used to evaluate if the data is inconsistent with the null hypothesis that the tree is correct and that there is no gene flow between  $Y$  and either  $W$  or  $X$ . It is based on comparing the proportions of BABA and ABBA sites patterns observed in the data.  $D$  is calculated as follow:  $D = (nBABA - nABBA) / (nBABA + nABBA)$ . We also calculated the  $f_4$ -statistic, which is very similar to  $D$  except that the denominator is the total number of sites (25). Gene flow between populations  $W$  and  $Y$  leads to an increase of shared alleles between populations resulting in an elevated number of BABA sites and thus a positive  $D$ -statistic and a positive  $f_4$ -statistic. Here, we tested for gene flow between both North African and Judean date palms individually (test sample) and two wild relative species, namely *P. theophrasti* and *P. sylvestris*. We conducted the tests separately including either *P. reclinata* or *P. canariensis* as the outgroup, following our tree reconstruction (Fig. S6b). We therefore estimated the  $D$ -statistics using the following tree:  $(((\text{test sample}, \text{West Asian date palms}), P. theophrasti \text{ or } P. sylvestris), P. reclinata \text{ or } P. canariensis)$ . We used all samples together for each population/species and after removing admixed samples, as identified using the ADMIXTURE analysis (PDAC64, PTHE2, PTHE3, PTHE4, PTHE26, PTHE27, PSYL7 and PSYL44). Significance was tested with block jackknife with each linkage groups and unplaced contigs treated as a separate block. The standard error of the statistics was used to calculate a standard score ( $Z$ -score = statistics / standard error), and we used an absolute  $Z$ -score  $>2$  to assess statistically significant results.

The  $f_3$ -statistic, also known as the three-population statistic, was used to test whether sample  $C$  is a mixture of two populations  $A$  and  $B$  (25). It measures the covariance of the difference in allele frequencies between populations  $C$  and  $A$  and populations  $C$  and  $B$  across genomic loci. If  $f_3$  is negative,  $C$  may be admixed between  $A$  and  $B$ ; a positive  $f_3$  is uninformative. Here, we tested whether each individual sample from the ancient Judean and the North African populations are a mixture of West Asian date palms and *P. theophrasti* i.e. we estimated the  $f_3$ -statistics as  $f_3(\text{test sample}; \text{West Asian date palms}; P. theophrasti)$ . We used all samples together for these two populations and after removing admixed samples, as identified using the ADMIXTURE analysis (PDAC64, PTHE2, PTHE3, PTHE4, PTHE 26 and PTHE27). Significance was

tested with block jackknife with each linkage groups and unplaced contigs treated as a separate block. The standard error of the statistics was used to calculate a standard score (Z-score = statistics / standard error), and we used an absolute Z-score >2 to assess statistically significant results.

To infer the proportion of ancestry in the North African and ancient Judean date palms from West Asian date palms and *P. theophrasti*, we calculated the  $f_4$ -ratio statistics, as described in Patterson *et al.* 2012 (25). More precisely, we defined the following tree (((A,B), C), O). The  $f_4$ -ratio is  $f_4(A,O;X,C)/f_4(A,O;B,C)$ , where X is the test sample, A is a sister species, namely *P. sylvestris*, B and C are the mixing populations, namely West Asian date palms and *P. theophrasti*, respectively, and O is the outgroup, that is *P. reclinata* or *P. canariensis*. We used all samples together for each population/species and after removing admixed samples, as identified using the ADMIXTURE analysis (PDAC64, PTHE2, PTHE3, PTHE4, PTHE26, PTHE27, PSYL7 and PSYL44). The resulting alpha value corresponds to the ancestry proportion of B in X, and by extension 1-alpha provides the proportion of C in X, therefore the proportion of *P. theophrasti* in the test sample X. Negative values are uninformative. Significance was tested with block jackknife with each linkage groups and unplaced contigs treated as a separate block. The standard error of the statistics was used to calculate a standard score (Z-score = statistics / standard error), and we used an absolute Z-score >2 to assess statistically significant results. We tested whether the most ancient Judean date palms show a different *P. theophrasti* introgression fraction than the most recent ones with a Wilcoxon rank sum test using the *wilcox.test* function.

**Chromosome painting and introgression tract lengths.** We performed local ancestry estimation *aka* chromosome painting with the software RFMix (27) v2.03-r0, restricting our analysis to the non-admixed samples and to the 18 linkage groups (see above). We first phased the VCF with Beagle (28) v. 4.1 using the genotype field (*gt* option). We then ran RFMix using default parameters and with query samples being the Judean and North African date palms while the reference samples were West Asian date palms and *P. theophrasti*. In the absence of a genetic map, we assumed that 1cM=1Mb. We then identified all the *P. theophrasti* tracts in the query genomes along with their length. Statistical tests to compare Judean and North African date palms were performed using either Student's tests (*t.test* in R) if data were normally distributed (as evidenced by Anderson-Darling tests for normality, *ad.test*) or Wilcoxon rank sum tests (*wilcox.test* in R).

**Genotyping of the fruit color and sugar composition loci.** We genotyped the Judean date palms at key loci involved in fruit color and sugar content identified by Hazzouri *et al.* 2015 and 2019 (3, 8). Fruit color varies between yellow and red at khalal stage and has been mapped to the *VIRESCENS* locus identified on linkage group 4 (3, 8). Three alleles have been proposed (8): *VIR*<sup>+</sup> (wild type allele), *VIR*<sup>IM</sup>, *VIR*<sup>IM</sup> and *vir*<sup>saf</sup>. The *VIR*<sup>IM</sup> allele has a retrotransposon inserted in the third exon which introduces a premature stop codon at position 169 of the translated protein (3). Our reference genome assembly contains this retrotransposon and to genotype this allele we manually examined reads that map to the breakpoint between exon 3 and the retrotransposon. Samples that do not have the insertion show clipped reads at the flanking regions of the retrotransposon. Mapped

reads from alleles with the retrotransposon insertion span the junction while non-insertion alleles have soft-clipped reads at the breakpoint in either some (heterozygotes) or all junction-spanning reads (homozygotes). All genotypes were confirmed to have matching patterns at both 5' and 3' ends of the insertion. Finally, the *vir<sup>saf</sup>* allele is defined by a SNP at position 24,051,180 which modifies the predicted translation initiation codon of *VIR* from ATG to ATA, likely resulting in a loss-of-function allele (8).

Sugar composition is a major agronomic trait in date palm and varieties are classified as reducing-sugar type (defined by high concentrations of glucose and fructose) or sucrose (high concentration of sucrose) (29). This phenotype is associated with a deletion that spans ~40 kb at approximately 2.467 to 2.507 Mb of linkage group 14, a region with multiple invertase genes (8). To genotype this locus, we identified, in each Judean date palm, whether they have a homozygote deletion in the region as evidenced by an absence of mapped reads (our genome assembly does not have the deletion).

## Supplementary Information Figures

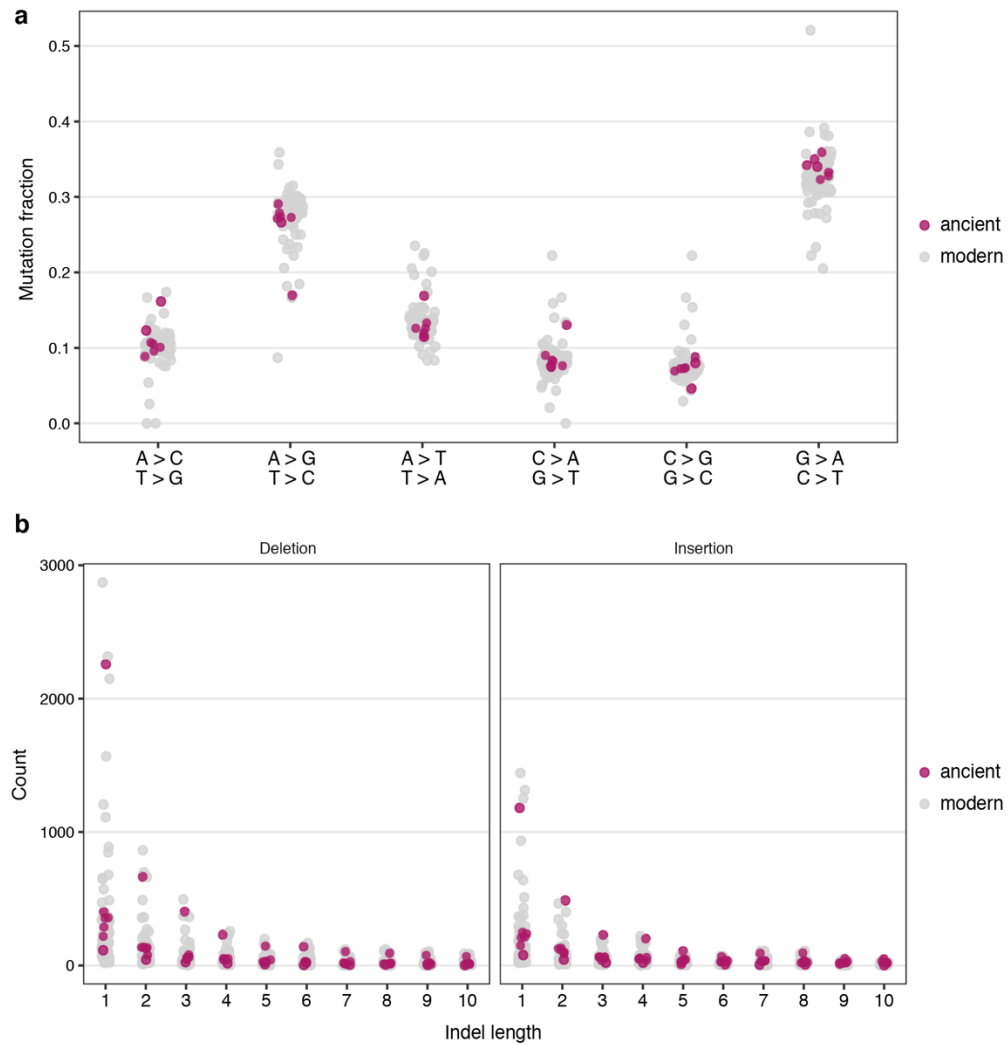

**Figure S1. Singleton mutational profile in modern and ancient Judean date palms.** a, Singleton substitution profile where the fraction of each mutation type is calculated as the mutation type count over the total number of mutations in each accession. No differences between ancient and modern samples were found using Wilcoxon rank sum tests: A>C/T>G:  $W = 243.5$ ,  $P = 0.80$ ; A>G/T>C:  $W = 345$ ,  $P = 0.15$ ; A>T/T>A:  $W = 325$ ,  $P = 0.27$ ; C>A/G>T:  $W = 276.5$ ,  $P = 0.78$ ; C>G/G>C:  $W = 255$ ,  $P = 0.95$ ; G>A/C>T:  $W = 155$ ,  $P = 0.082$ ; b, Singleton indel counts in each accession for length comprised between 1 and 10bp.



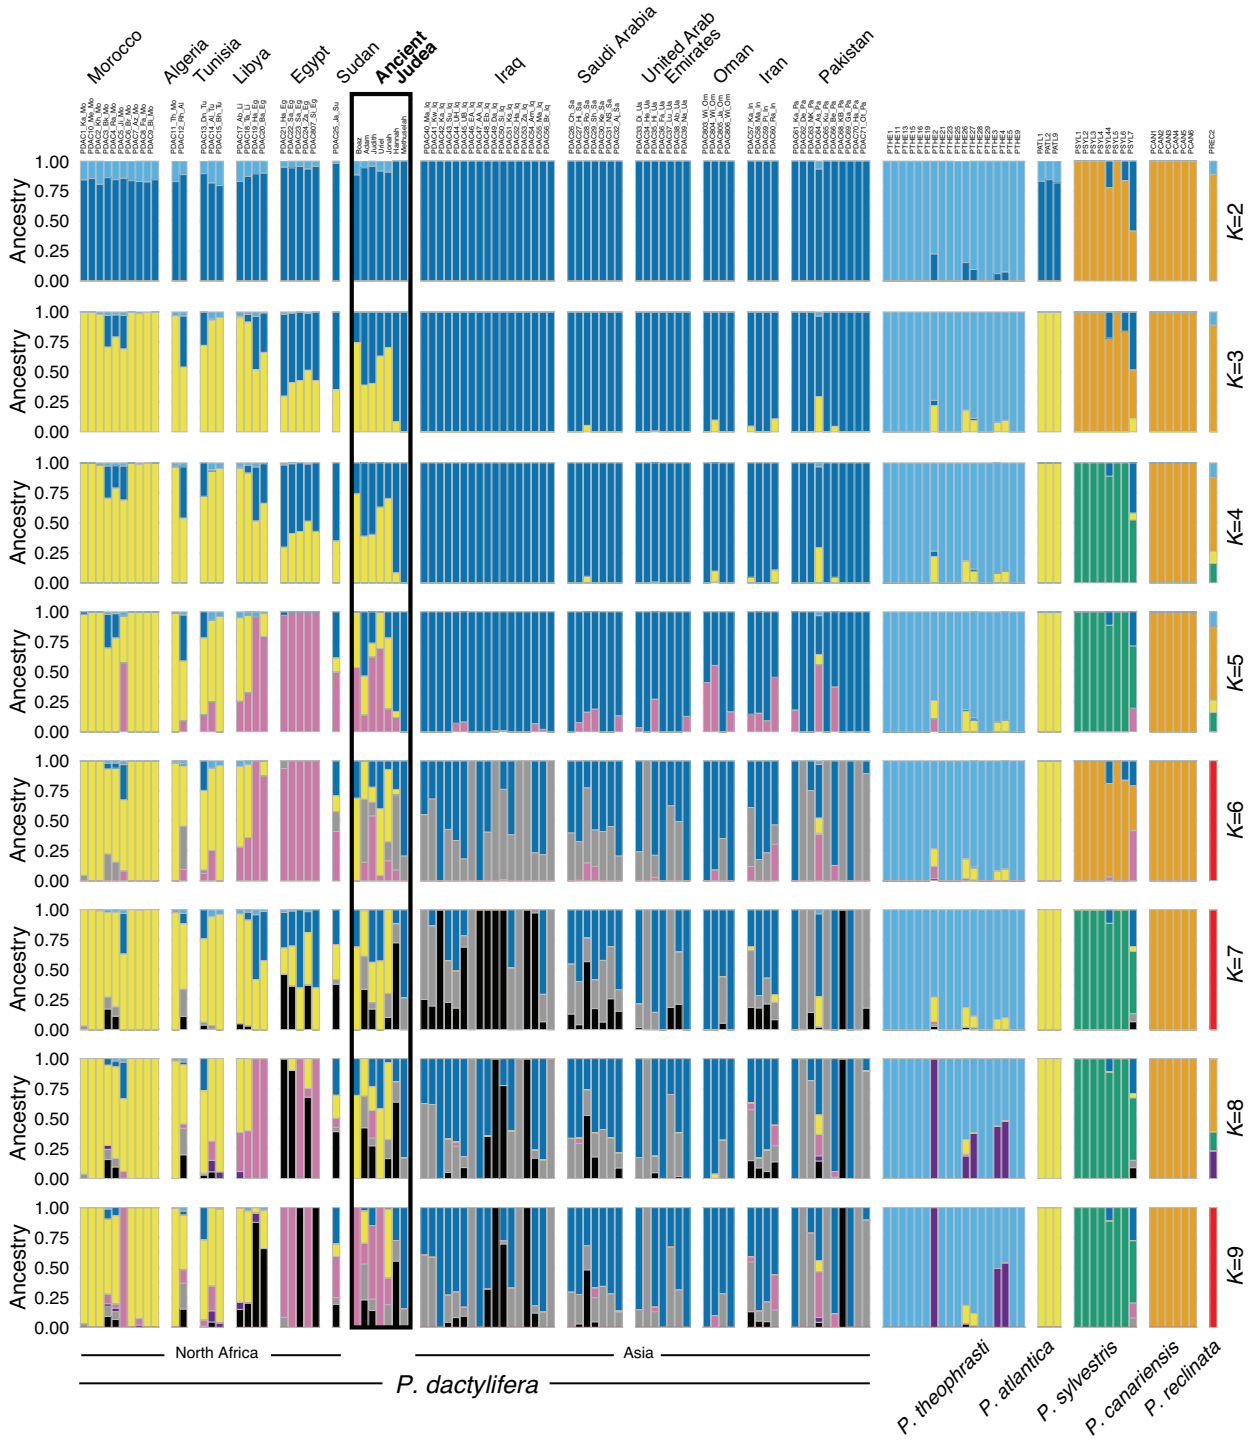

**Figure S2.** Ancestry coefficients inferred in 117 date palms and *Phoenix* spp. accessions using a randomly downsampled set of 53,845 SNPs. Cross-validation error plot may be found in Fig. S3a.

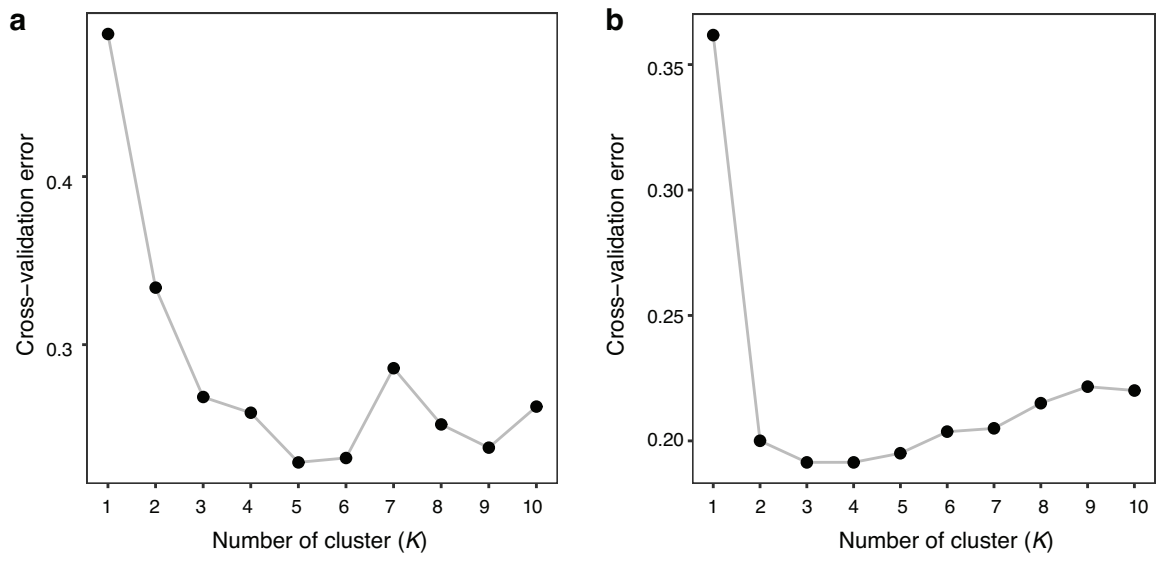

**Figure S3. Cross-validation error of the admixture models.** a, Model including all *Phoenix* species included in this manuscript; b, Model with *P. dactylifera* and *P. theophrasti*. Corresponding ancestry plots may be found in Figs. S2 and Fig. S3, respectively.

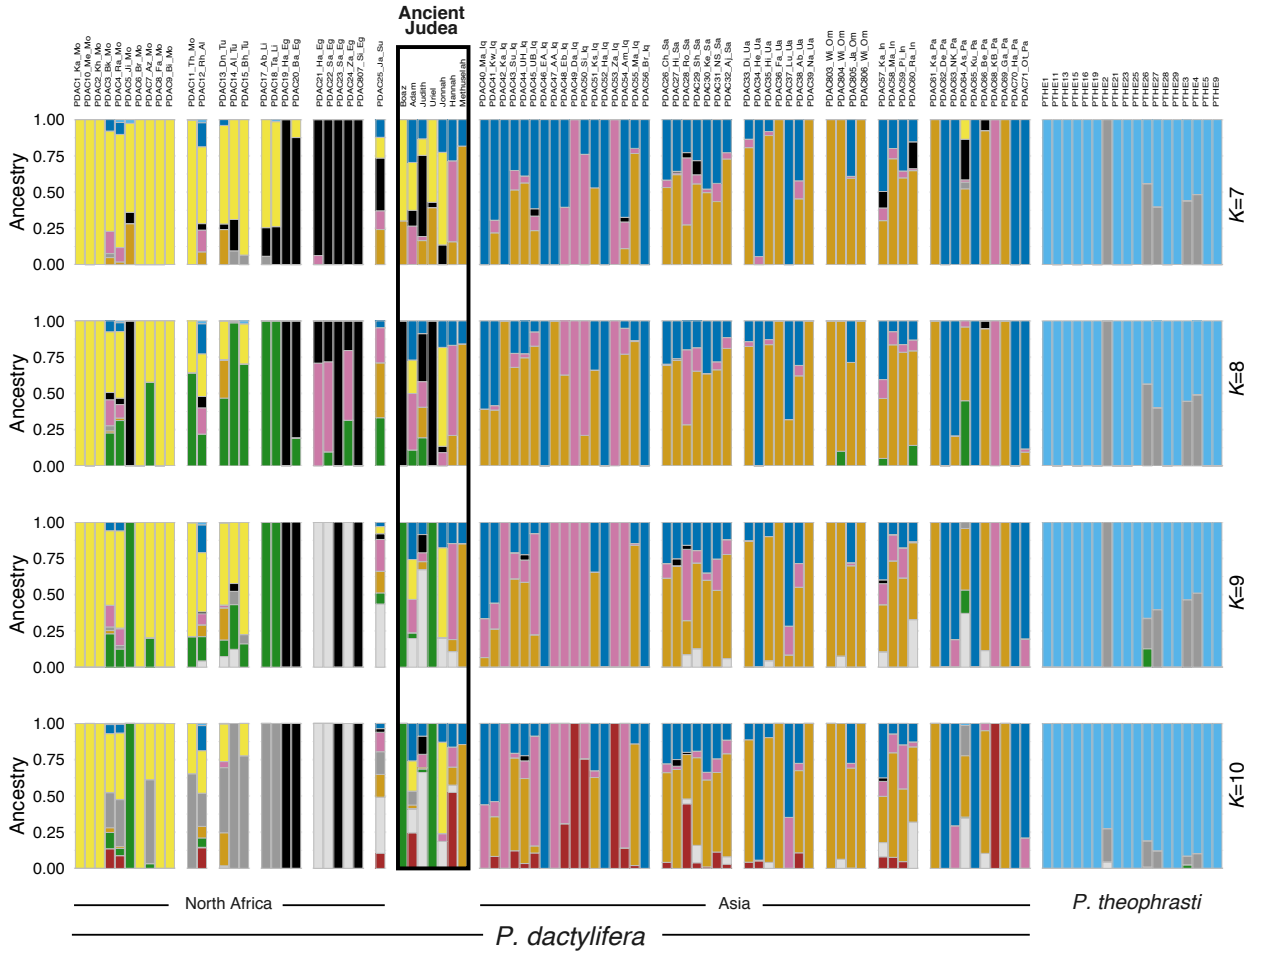

**Figure S4.** Ancestry coefficients inferred in 99 date palms and *P. theophrasti* accessions using a randomly downsampled set of 53,845 SNPs. The number of cluster ( $K$ ) ranges from seven to ten ( $K = 2$  to 6 can be found in Fig. 2). The Judean date palms are ordered as follow from left to right: Boaz, Adam, Judith, Uriel, Jonah, Hannah, Methuselah. Cross-validation error plot may be found in Fig. S3b.

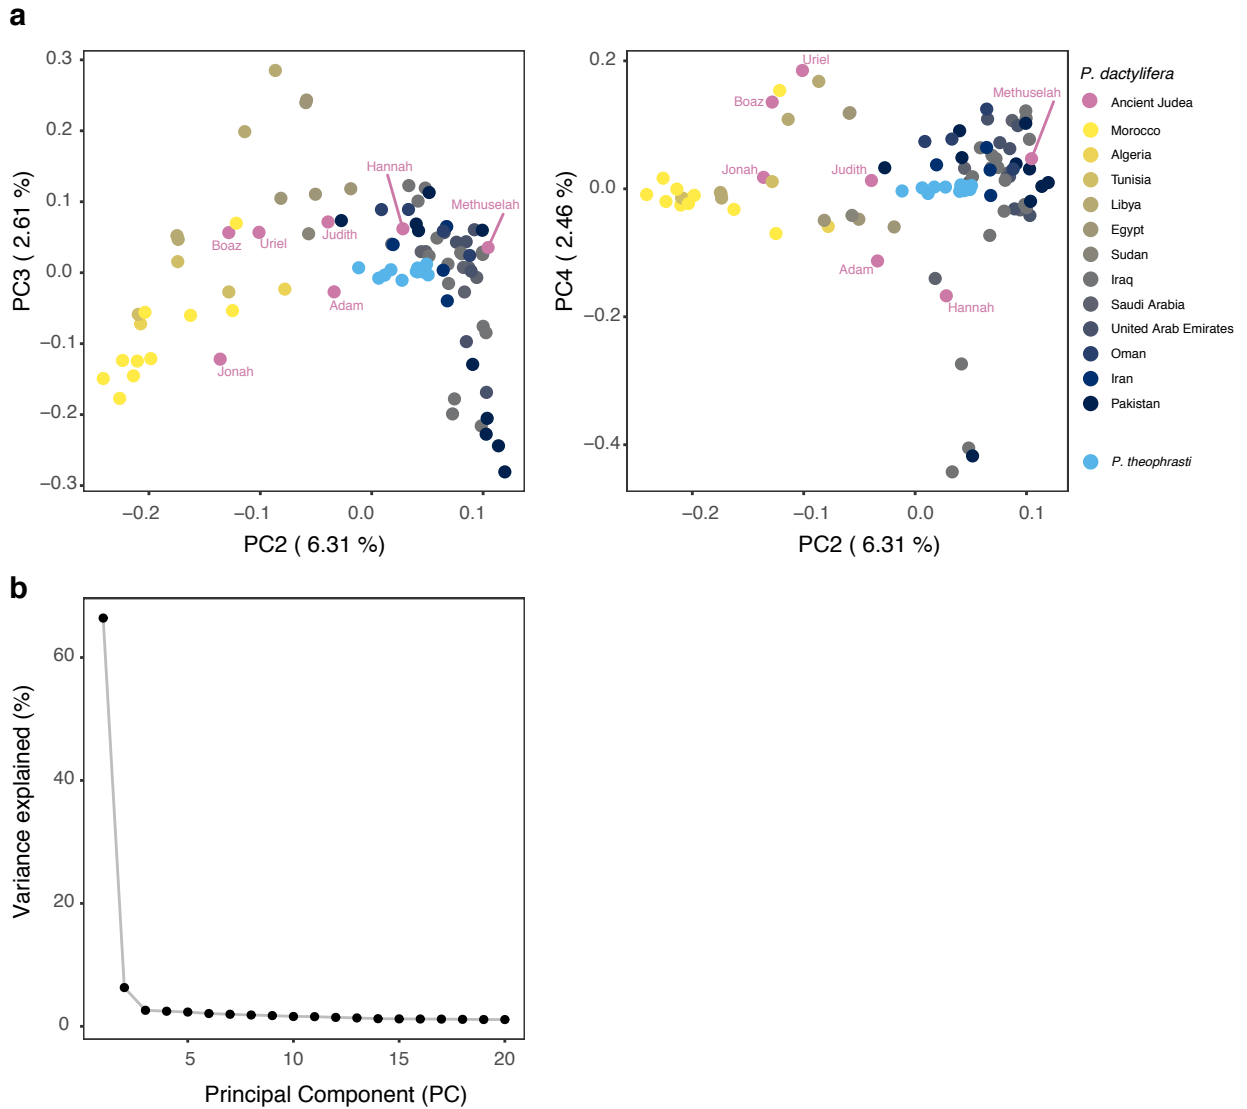

**Figure S5. Principal component analysis of 99 *Phoenix* spp. accessions including the seven Judean date palms genotyped on 24,689 SNPs. a, PCA plots of PC2/PC3 (left) and PC2/PC4 (right). The variance explained by each principal component is given in parentheses. The plot showing PC1/PC2 is in Fig. 3a; b, Variance explained by each principal component.**

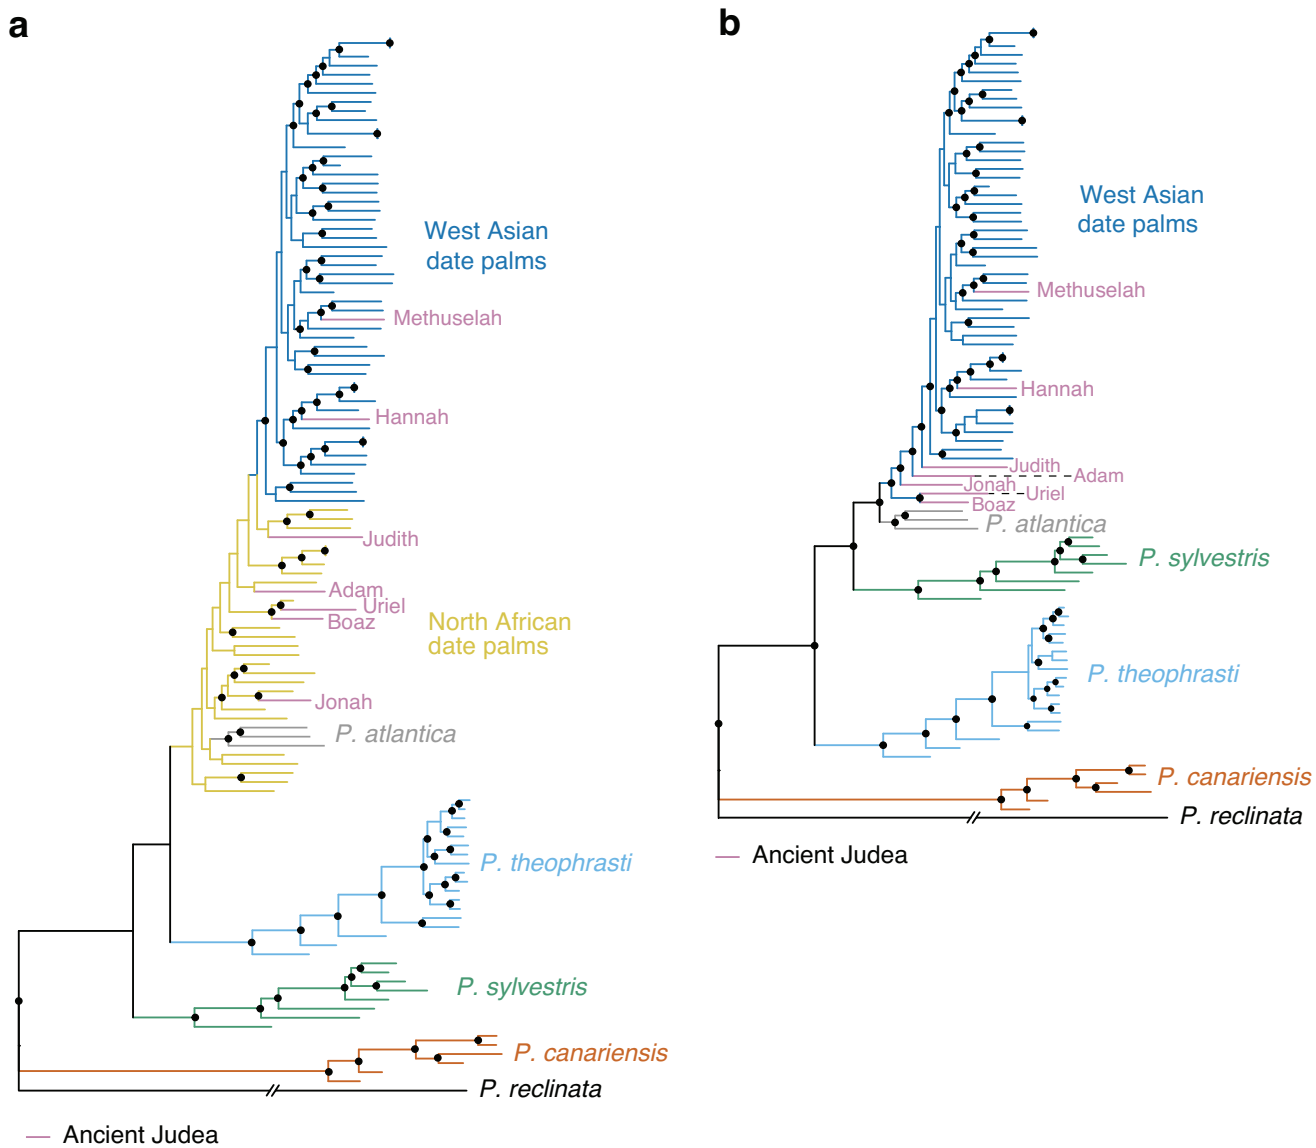

**Figure S6. Phylogenetic relationships among *Phoenix* inferred from 53,845 SNPs.** a, Inference including all 117 *Phoenix* spp. accessions; b, Inference after exclusion of the North African date palms and an admixed Asian sample. The trees were rooted with *Phoenix reclinata*. Black circles indicate nodes with >80% bootstrap support.

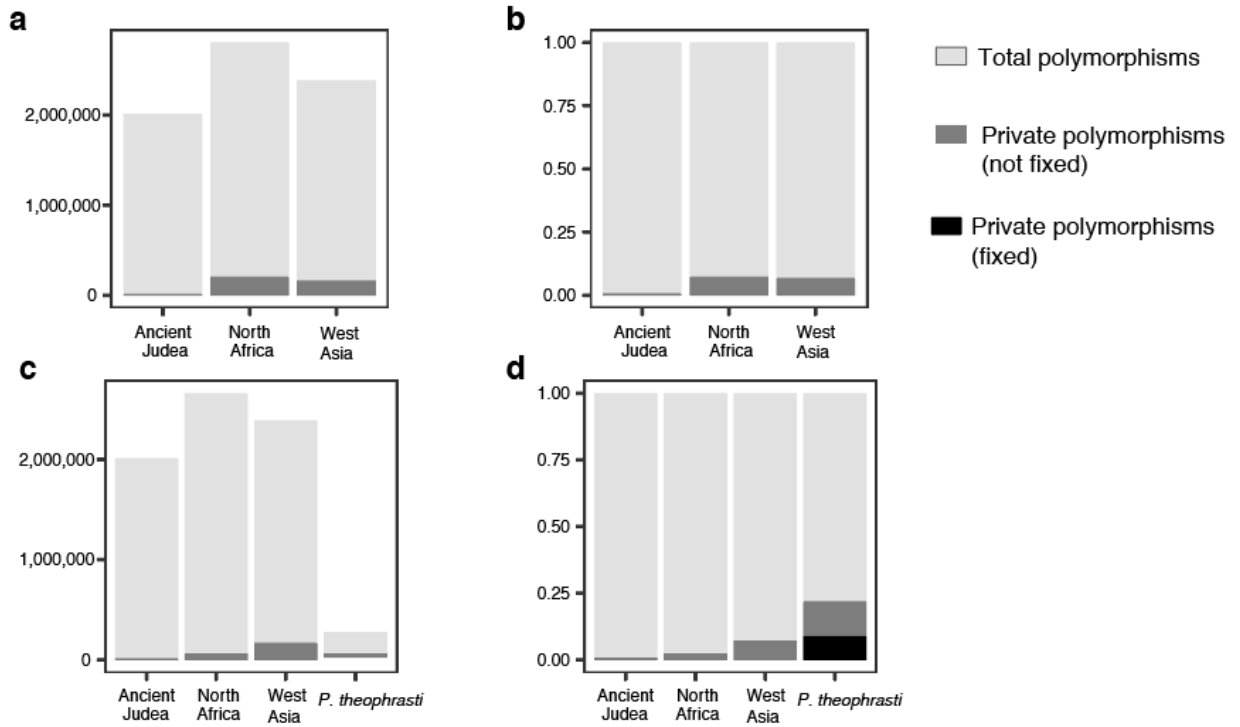

**Figure S7. Summary of polymorphisms and private alleles in date palm and *Phoenix theophrasti*.** On the left panels (a and c), we show the actual number of polymorphisms while in the right panels (b and d), we show the fraction of private and private fixed SNPs over the total number of polymorphisms. a and b show the level of polymorphism in three date palm populations, while in c and d the wild relative *Phoenix theophrasti* have been included in the analysis.

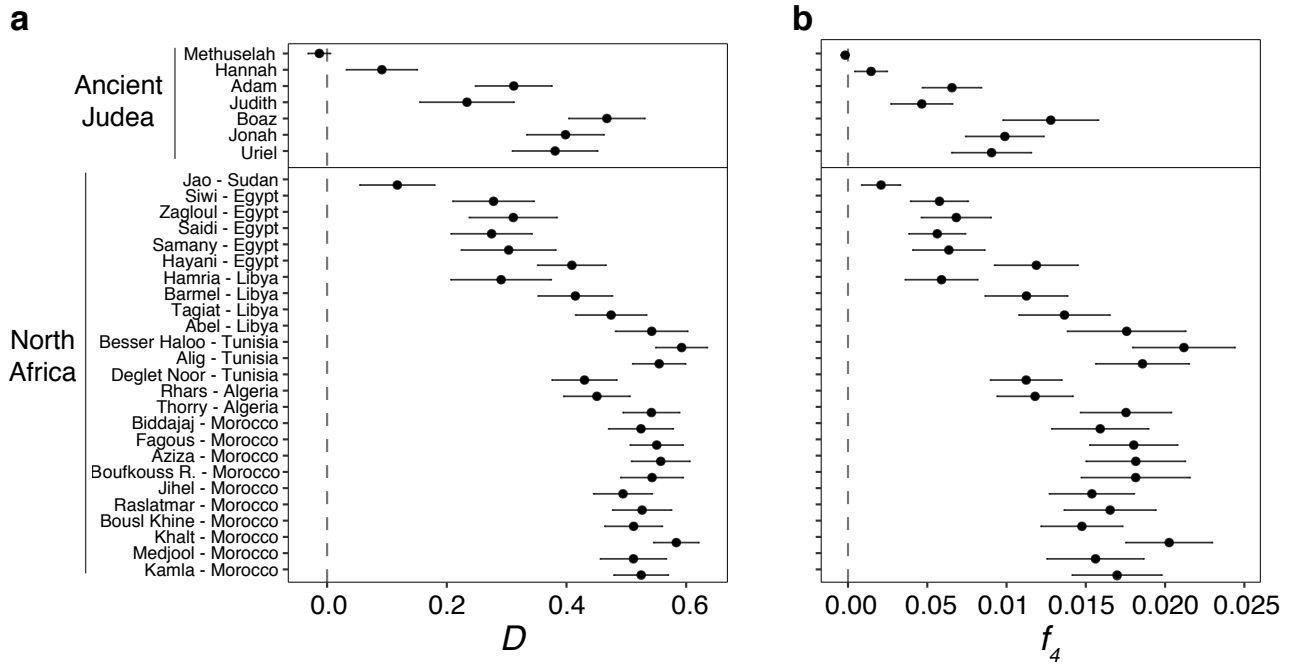

**Figure S8. Admixture between ancient Judean / modern North African date palms and *Phoenix theophrasti*.** a, Admixture  $D$ -statistic and b, Admixture  $f_4$ -statistic, both testing whether ancient Judean and modern North African date palms show an excess of shared derived alleles with *Phoenix theophrasti*, in which case they are significantly positive. We estimated both the  $D$ -statistics and  $f_4$ -statistics using the following tree: (((test sample, West Asian date palms), *P. theophrasti*), *P. canariensis*). The same analyses with *Phoenix reclinata* as the outgroup are in Fig. 4.

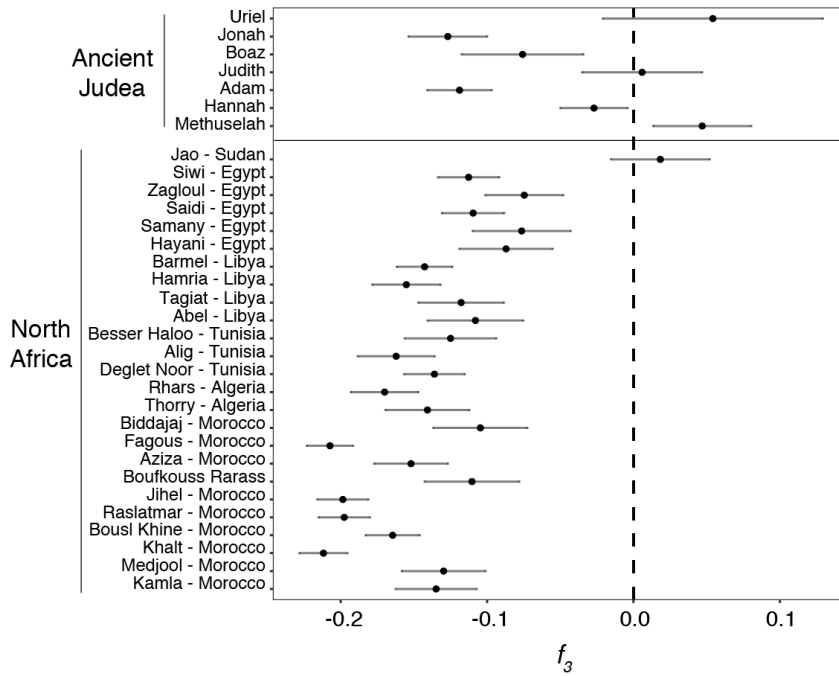

**Figure S9. Admixture  $f_3$ -statistic, testing whether ancient Judean and modern North African date palms are mixed from West Asian date palms and *Phoenix theophrasti*.** We estimated the  $f_3$ -statistics as  $f_3(\text{test sample}; \text{West Asian date palms}; P. \textit{theophrasti})$ . A negative  $f_3$ -statistic indicate that the test sample is likely mixed from these two populations/species.



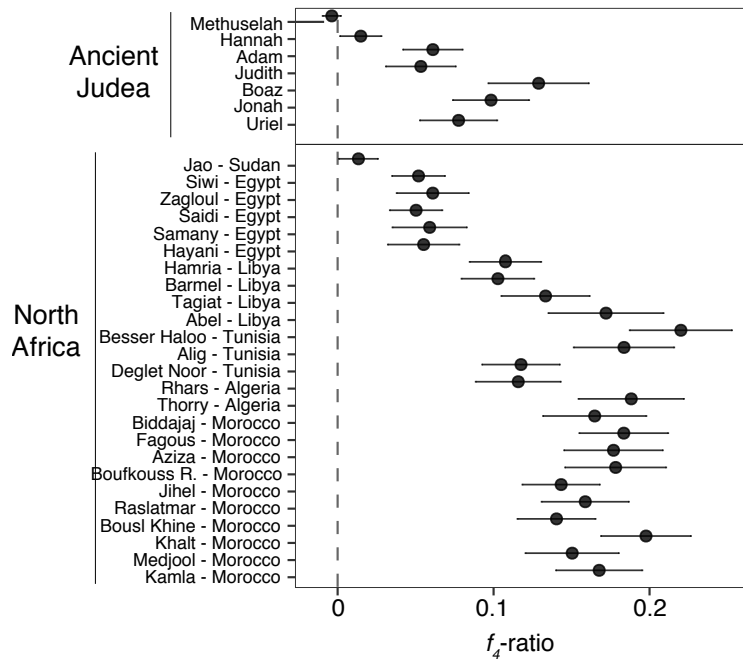

**Figure S10. Admixture proportion in ancient Judean and modern North African date palms.** The  $f_4$ -ratio statistic is indicating the fraction of *P. theophrasti* genomes found in the test sample. We calculated the  $f_4$ -ratio statistics as  $f_4(A,O;X,C)/f_4(A,O;B,C)$ , where X is the test sample, A is a sister species, namely *P. sylvestris*, B and C are the mixing populations, namely West Asian date palms and *P. theophrasti*, respectively, and O is the outgroup, that is *P. canariensis*. The same analysis with *Phoenix reclinata* as the outgroup is in Fig. 5a.

## Supplementary Information Tables

**Table S1. List of Phoenix spp. accessions, their geographic origin and source**

| <b>ID</b>     | <b>Species</b>        | <b>Cultivar</b> | <b>Country of collect</b> | <b>Country of origin</b> | <b>Source</b> | <b>GenBank accession</b> |
|---------------|-----------------------|-----------------|---------------------------|--------------------------|---------------|--------------------------|
| PATL1         | <i>P. atlantica</i>   | NA              | Cape Verde                | Cape Verde               | 1             | SAMN10272237             |
| PATL2         | <i>P. atlantica</i>   | NA              | Cape Verde                | Cape Verde               | 1             | SAMN10272238             |
| PATL9         | <i>P. atlantica</i>   | NA              | Cape Verde                | Cape Verde               | 2             | SAMN04413862             |
| PCAN1         | <i>P. canariensis</i> | NA              | France                    | Canary Islands, Spain    | 1             | SAMN10272206             |
| PCAN2         | <i>P. canariensis</i> | NA              | France                    | Canary Islands, Spain    | 1             | SAMN10272207             |
| PCAN3         | <i>P. canariensis</i> | NA              | Italy                     | Canary Islands, Spain    | 1             | SAMN10272208             |
| PCAN4         | <i>P. canariensis</i> | NA              | Italy                     | Canary Islands, Spain    | 1             | SAMN10272209             |
| PCAN5         | <i>P. canariensis</i> | NA              | Italy                     | Canary Islands, Spain    | 1             | SAMN10272210             |
| PCAN6         | <i>P. canariensis</i> | NA              | USA                       | Canary Islands, Spain    | 1             | SAMN10272211             |
| PDAC11_Th_Al  | <i>P. dactylifera</i> | Thory           | USA                       | Algeria                  | 3             | SAMN04108817             |
| PDAC12_Rh_Al  | <i>P. dactylifera</i> | Rhars           | USA                       | Algeria                  | 3             | SAMN04108818             |
| PDAC21_Ha_Eg  | <i>P. dactylifera</i> | Hayany          | USA                       | Egypt                    | 3             | SAMN04108822             |
| PDAC22_Sa_Eg  | <i>P. dactylifera</i> | Samany          | USA                       | Egypt                    | 3             | SAMN04108823             |
| PDAC23_Sa_Eg  | <i>P. dactylifera</i> | Saidi           | USA                       | Egypt                    | 3             | SAMN04108820             |
| PDAC24_Za_Eg  | <i>P. dactylifera</i> | Zagloul         | Syria                     | Egypt                    | 3             | SAMN04108821             |
| PDAC807_Si_Eg | <i>P. dactylifera</i> | Siwi            | Egypt                     | Egypt                    | 2             | SAMN04413858             |
| PDAC57_Ka_In  | <i>P. dactylifera</i> | Kabkab Red      | Syria                     | Iran                     | 3             | SAMN04108827             |
| PDAC58_Ma_In  | <i>P. dactylifera</i> | Mazafati        | Qatar                     | Iran                     | 3             | SAMN04108826             |
| PDAC59_Pi_In  | <i>P. dactylifera</i> | Piavom          | Qatar                     | Iran                     | 3             | SAMN04108824             |
| PDAC60_Ra_In  | <i>P. dactylifera</i> | Rabee           | Qatar                     | Iran                     | 3             | SAMN04108825             |

|              |                       |              |         |         |   |              |
|--------------|-----------------------|--------------|---------|---------|---|--------------|
| PDAC40_Ma_Iq | <i>P. dactylifera</i> | Maktoumi     | UAE     | Iraq    | 3 | SAMN04108860 |
| PDAC41_Kw_Iq | <i>P. dactylifera</i> | Khadrawy     | USA     | Iraq    | 3 | SAMN04108831 |
| PDAC42_Ka_Iq | <i>P. dactylifera</i> | Khastawi     | USA     | Iraq    | 3 | SAMN04108832 |
| PDAC43_Su_Iq | <i>P. dactylifera</i> | Sultana      | UAE     | Iraq    | 3 | SAMN04108836 |
| PDAC44_UH_Iq | <i>P. dactylifera</i> | Um al hamam  | Iraq    | Iraq    | 3 | SAMN04108835 |
| PDAC45_UB_Iq | <i>P. dactylifera</i> | Um al blaliz | Iraq    | Iraq    | 3 | SAMN04108834 |
| PDAC46_EA_Iq | <i>P. dactylifera</i> | Ewent Ayob   | Iraq    | Iraq    | 3 | SAMN04108839 |
| PDAC47_AA_Iq | <i>P. dactylifera</i> | Azraq Azraq  | Iraq    | Iraq    | 3 | SAMN04108837 |
| PDAC48_Eb_Iq | <i>P. dactylifera</i> | Ebrahimi     | Iraq    | Iraq    | 3 | SAMN04108838 |
| PDAC49_Da_Iq | <i>P. dactylifera</i> | Dajwani      | Iraq    | Iraq    | 3 | SAMN04108876 |
| PDAC50_Si_Iq | <i>P. dactylifera</i> | Silani       | Iraq    | Iraq    | 3 | SAMN04108840 |
| PDAC51_Ks_Iq | <i>P. dactylifera</i> | Khisab       | USA     | Iraq    | 3 | SAMN04108864 |
| PDAC52_Ha_Iq | <i>P. dactylifera</i> | Halawy       | USA     | Iraq    | 3 | SAMN04108863 |
| PDAC53_Za_Iq | <i>P. dactylifera</i> | Zahidi       | USA     | Iraq    | 3 | SAMN04108833 |
| PDAC54_Am_Iq | <i>P. dactylifera</i> | Amir Haj     | USA     | Iraq    | 3 | SAMN04108819 |
| PDAC55_Ma_Iq | <i>P. dactylifera</i> | Manjouma     | Iraq    | Iraq    | 1 | SAMN10272193 |
| PDAC56_Br_Iq | <i>P. dactylifera</i> | Braim        | USA     | Iraq    | 3 | SAMN04108845 |
| PDAC17_Ab_Li | <i>P. dactylifera</i> | Abel         | Libya   | Libya   | 3 | SAMN04108830 |
| PDAC18-Ta_Li | <i>P. dactylifera</i> | Tagiat       | Libya   | Libya   | 3 | SAMN04108828 |
| PDAC19_Ha_Li | <i>P. dactylifera</i> | Hamria       | Libya   | Libya   | 1 | SAMN10272197 |
| PDAC20_Ba_Li | <i>P. dactylifera</i> | Barmel       | Libya   | Libya   | 1 | SAMN10272198 |
| PDAC1_Ka_Mo  | <i>P. dactylifera</i> | Kamla        | Morocco | Morocco | 1 | SAMN10272199 |
| PDAC10_Me_Mo | <i>P. dactylifera</i> | Medjool      | UAE     | Morocco | 3 | SAMN04108841 |
| PDAC2_Kh_Mo  | <i>P. dactylifera</i> | Khalt        | Morocco | Morocco | 1 | SAMN10272204 |

|               |                       |                  |          |              |   |              |
|---------------|-----------------------|------------------|----------|--------------|---|--------------|
| PDAC3_Bk_Mo   | <i>P. dactylifera</i> | Bouisl Khine     | Morocco  | Morocco      | 1 | SAMN10272200 |
| PDAC4_Ra_Mo   | <i>P. dactylifera</i> | Raslatmar        | Morocco  | Morocco      | 1 | SAMN10272201 |
| PDAC5_Ji_Mo   | <i>P. dactylifera</i> | Jihl             | Morocco  | Morocco      | 1 | SAMN10272202 |
| PDAC6_Br_Mo   | <i>P. dactylifera</i> | Boufkouss Rarass | Morocco  | Morocco      | 1 | SAMN10272203 |
| PDAC7_Az_Mo   | <i>P. dactylifera</i> | Aziza            | Morocco  | Morocco      | 3 | SAMN04108844 |
| PDAC8_Fa_Mo   | <i>P. dactylifera</i> | Fagous           | Morocco  | Morocco      | 3 | SAMN04108842 |
| PDAC9_Bi_Mo   | <i>P. dactylifera</i> | Biddajaj         | Morocco  | Morocco      | 3 | SAMN04108843 |
| PDAC803_Wi_Om | <i>P. dactylifera</i> | NA               | Oman     | Oman         | 2 | SAMN04413859 |
| PDAC804_Wi_Om | <i>P. dactylifera</i> | NA               | Oman     | Oman         | 2 | SAMN04413860 |
| PDAC805_Ja_Om | <i>P. dactylifera</i> | Jabri            | Oman     | Oman         | 2 | SAMN04413857 |
| PDAC806_Wi_Om | <i>P. dactylifera</i> | NA               | Oman     | Oman         | 2 | SAMN04413861 |
| PDAC61_Ka_Pa  | <i>P. dactylifera</i> | Kashoowari       | Pakistan | Pakistan     | 3 | SAMN04108846 |
| PDAC62_De_Pa  | <i>P. dactylifera</i> | Dedhi            | Pakistan | Pakistan     | 3 | SAMN04108849 |
| PDAC63_NK_Pa  | <i>P. dactylifera</i> | Naquel Khuh      | Pakistan | Pakistan     | 3 | SAMN04108847 |
| PDAC64_As_Pa  | <i>P. dactylifera</i> | Aseel            | Pakistan | Pakistan     | 3 | SAMN04108850 |
| PDAC65_Ku_Pa  | <i>P. dactylifera</i> | Kuproo           | Pakistan | Pakistan     | 3 | SAMN04108851 |
| PDAC66_Be_Pa  | <i>P. dactylifera</i> | Began            | Pakistan | Pakistan     | 3 | SAMN04108829 |
| PDAC68_KB_Pa  | <i>P. dactylifera</i> | Karbali          | Pakistan | Pakistan     | 3 | SAMN04108848 |
| PDAC69_Ga_Pa  | <i>P. dactylifera</i> | Gajar            | Pakistan | Pakistan     | 1 | SAMN10272194 |
| PDAC70_Ha_Pa  | <i>P. dactylifera</i> | Hawawiri         | Pakistan | Pakistan     | 1 | SAMN10272195 |
| PDAC71_Ot_Pa  | <i>P. dactylifera</i> | Otaquin          | Pakistan | Pakistan     | 1 | SAMN10272196 |
| PDAC26_Ch_Sa  | <i>P. dactylifera</i> | Chichi           | UAE      | Saudi Arabia | 3 | SAMN04103916 |
| PDAC27_Hi_Sa  | <i>P. dactylifera</i> | Hilali           | USA      | Saudi Arabia | 3 | SAMN04108853 |
| PDAC28_Ro_Sa  | <i>P. dactylifera</i> | Rothan           | UAE      | Saudi Arabia | 3 | SAMN04108857 |

|              |                       |              |          |              |   |              |
|--------------|-----------------------|--------------|----------|--------------|---|--------------|
| PDAC29_Sh_Sa | <i>P. dactylifera</i> | Shagri       | UAE      | Saudi Arabia | 3 | SAMN04108859 |
| PDAC30_Ke_Sa | <i>P. dactylifera</i> | Khenezi      | UAE      | Saudi Arabia | 3 | SAMN04108854 |
| PDAC31_NS_Sa | <i>P. dactylifera</i> | Nebeit Seif  | UAE      | Saudi Arabia | 3 | SAMN04108855 |
| PDAC32_Aj_Sa | <i>P. dactylifera</i> | Ajwa         | UAE      | Saudi Arabia | 3 | SAMN04108856 |
| PDAC25_Ja_Su | <i>P. dactylifera</i> | Jao          | UAE      | Sudan        | 3 | SAMN04108865 |
| PDAC13_Dn_Tu | <i>P. dactylifera</i> | Deglet Noor  | Tunisia  | Tunisia      | 3 | SAMN04108868 |
| PDAC14_Al_Tu | <i>P. dactylifera</i> | Alig         | Tunisia  | Tunisia      | 3 | SAMN04108866 |
| PDAC15_Bh_Tu | <i>P. dactylifera</i> | Besser Haloo | Tunisia  | Tunisia      | 3 | SAMN04108867 |
| PDAC33_Di_Ua | <i>P. dactylifera</i> | Dibbas       | UAE      | UAE          | 3 | SAMN04108545 |
| PDAC34_He_Ua | <i>P. dactylifera</i> | Helwa        | UAE      | UAE          | 3 | SAMN04108870 |
| PDAC35_Hi_Ua | <i>P. dactylifera</i> | Hiri         | UAE      | UAE          | 3 | SAMN04108874 |
| PDAC36_Fa_Ua | <i>P. dactylifera</i> | Fard4        | USA      | UAE          | 3 | SAMN04108875 |
| PDAC37_Lu_Ua | <i>P. dactylifera</i> | Lulu         | UAE      | UAE          | 3 | SAMN04108871 |
| PDAC38_Ab_Ua | <i>P. dactylifera</i> | Abouman      | UAE      | UAE          | 3 | SAMN04108873 |
| PDAC39_Na_Ua | <i>P. dactylifera</i> | Nagal        | UAE      | UAE          | 3 | SAMN04108872 |
| PREC2        | <i>P. reclinata</i>   | NA           | USA      | Rwanda       | 1 | SAMN10272205 |
| PSYL1        | <i>P. sylvestris</i>  | NA           | USA      | NA           | 1 | SAMN10272212 |
| PSYL2        | <i>P. sylvestris</i>  | NA           | USA      | NA           | 1 | SAMN10272213 |
| PSYL3        | <i>P. sylvestris</i>  | NA           | USA      | NA           | 1 | SAMN10272214 |
| PSYL4        | <i>P. sylvestris</i>  | NA           | USA      | NA           | 1 | SAMN10272215 |
| PSYL44       | <i>P. sylvestris</i>  | NA           | India    | India        | 2 | SAMN04413863 |
| PSYL5        | <i>P. sylvestris</i>  | NA           | USA      | NA           | 1 | SAMN10272216 |
| PSYL6        | <i>P. sylvestris</i>  | NA           | Spain    | NA           | 1 | SAMN10272217 |
| PSYL7        | <i>P. sylvestris</i>  | NA           | Pakistan | Pakistan     | 1 | SAMN10272218 |

|        |                       |    |        |               |   |              |
|--------|-----------------------|----|--------|---------------|---|--------------|
| PTHE1  | <i>P. theophrasti</i> | NA | Italy  | Greece        | 3 | SAMN10272219 |
| PTHE11 | <i>P. theophrasti</i> | NA | Greece | Crete, Greece | 1 | SAMN10272225 |
| PTHE13 | <i>P. theophrasti</i> | NA | Greece | Crete, Greece | 1 | SAMN10272226 |
| PTHE15 | <i>P. theophrasti</i> | NA | Greece | Crete, Greece | 1 | SAMN10272227 |
| PTHE16 | <i>P. theophrasti</i> | NA | Greece | Crete, Greece | 1 | SAMN10272228 |
| PTHE19 | <i>P. theophrasti</i> | NA | Greece | Crete, Greece | 1 | SAMN10272229 |
| PTHE2  | <i>P. theophrasti</i> | NA | Italy  | NA            | 1 | SAMN10272220 |
| PTHE21 | <i>P. theophrasti</i> | NA | Greece | Crete, Greece | 1 | SAMN10272230 |
| PTHE23 | <i>P. theophrasti</i> | NA | Greece | Crete, Greece | 1 | SAMN10272231 |
| PTHE25 | <i>P. theophrasti</i> | NA | Greece | Crete, Greece | 1 | SAMN10272232 |
| PTHE26 | <i>P. theophrasti</i> | NA | Greece | Crete, Greece | 1 | SAMN10272233 |
| PTHE27 | <i>P. theophrasti</i> | NA | Greece | Crete, Greece | 1 | SAMN10272234 |
| PTHE28 | <i>P. theophrasti</i> | NA | Greece | Libya         | 1 | SAMN10272235 |
| PTHE29 | <i>P. theophrasti</i> | NA | Greece | Crete, Greece | 1 | SAMN10272236 |
| PTHE3  | <i>P. theophrasti</i> | NA | Greece | Crete, Greece | 1 | SAMN10272221 |
| PTHE4  | <i>P. theophrasti</i> | NA | Greece | Crete, Greece | 1 | SAMN10272222 |
| PTHE5  | <i>P. theophrasti</i> | NA | Greece | Crete, Greece | 1 | SAMN10272223 |
| PTHE9  | <i>P. theophrasti</i> | NA | Greece | Crete, Greece | 1 | SAMN10272224 |

Source: 1 – Flowers et al. 2019. Cross-species hybridization and the origin of North African date palms. Proc. Natl. Acad. Sci. U. S. A. 116, 1651–1658; 2 - Gros-Balthazard et al. 2017. The discovery of wild date palms in Oman reveals a complex domestication history involving centers in the Middle East and Africa. Curr. Biol. 27, 2211–2218; 3 – Hazzouri et al. 2015. Whole genome re-sequencing of date palms yields insights into diversification of a fruit tree crop. Nat. Commun. 6, 8824

**Table S2. Sequencing and read alignments metrics.**

| <b>ID</b>    | <b># reads</b> | <b># mapped reads</b> | <b>Proportion mapped</b> | <b>Depth</b> |
|--------------|----------------|-----------------------|--------------------------|--------------|
| PATL1        | 197,158,412    | 195,548,314           | 99.2                     | 23.3         |
| PATL2        | 177,816,454    | 176,063,722           | 99.0                     | 21.0         |
| PATL9        | 77,525,586     | 76,827,615            | 99.1                     | 10.4         |
| PCAN1        | 192,687,974    | 190,031,402           | 98.6                     | 23.6         |
| PCAN2        | 174,401,608    | 172,211,870           | 98.7                     | 21.4         |
| PCAN3        | 184,205,404    | 181,720,551           | 98.7                     | 22.5         |
| PCAN4        | 200,974,554    | 198,210,043           | 98.6                     | 25.1         |
| PCAN5        | 182,193,640    | 179,664,201           | 98.6                     | 22.3         |
| PCAN6        | 101,872,484    | 100,362,011           | 98.5                     | 13.9         |
| PDAC1_Ka_Mo  | 64,295,532     | 63,623,840            | 99.0                     | 8.1          |
| PDAC10_Me_Mo | 119,940,728    | 119,068,553           | 99.3                     | 14.5         |
| Boaz         | 340,936,352    | 333,724,692           | 97.9                     | 41.1         |
| Adam         | 295,123,720    | 287,493,700           | 97.4                     | 35.8         |
| Judith       | 307,846,880    | 301,073,499           | 97.8                     | 35.9         |
| Uriel        | 357,116,030    | 349,387,223           | 97.8                     | 42.3         |
| Jonnah       | 344,095,200    | 336,110,891           | 97.7                     | 40.6         |
| Hannah       | 331,863,442    | 324,193,419           | 97.7                     | 40.2         |
| PDAC11_Th_Mo | 149,799,322    | 148,613,125           | 99.2                     | 18.0         |
| PDAC12_Rh_Al | 163,712,090    | 162,438,077           | 99.2                     | 19.5         |
| PDAC13_Dn_Tu | 138,303,880    | 137,123,535           | 99.1                     | 16.6         |
| PDAC14_Al_Tu | 142,887,896    | 141,736,208           | 99.2                     | 16.8         |
| PDAC15_Bh_Tu | 161,563,172    | 160,219,397           | 99.2                     | 18.5         |
| PDAC17_Ab_Li | 151,405,024    | 150,325,950           | 99.3                     | 18.1         |
| PDAC18-Ta_Li | 228,882,532    | 227,284,180           | 99.3                     | 27.3         |
| PDAC19_Ha_Li | 61,282,522     | 50,490,461            | 82.4                     | 6.5          |
| PDAC2_Kh_Mo  | 105,332,060    | 104,048,946           | 98.8                     | 12.7         |
| PDAC20_Ba_Li | 63,021,546     | 62,458,390            | 99.1                     | 8.0          |
| PDAC21_Ha_Eg | 413,069,026    | 406,452,682           | 98.4                     | 46.4         |
| PDAC22_Sa_Eg | 304,948,916    | 297,389,629           | 97.5                     | 34.9         |
| PDAC23_Sa_Eg | 144,017,910    | 143,000,478           | 99.3                     | 17.1         |
| PDAC24_Za_Eg | 172,140,454    | 171,005,631           | 99.3                     | 20.4         |
| PDAC25_Ja_Su | 149,538,326    | 148,274,447           | 99.2                     | 18.2         |
| PDAC26_Ch_Sa | 103,075,942    | 102,513,577           | 99.5                     | 12.5         |
| PDAC27_Hi_Sa | 40,812,836     | 40,587,230            | 99.4                     | 5.3          |
| PDAC28_Ro_Sa | 151,663,576    | 150,219,998           | 99.0                     | 18.1         |
| PDAC29_Sh_Sa | 124,625,060    | 123,664,433           | 99.2                     | 15.0         |
| PDAC3_Bk_Mo  | 77,950,280     | 76,600,812            | 98.3                     | 9.6          |

|              |             |             |      |      |
|--------------|-------------|-------------|------|------|
| PDAC30_Ke_Sa | 180,780,780 | 179,533,343 | 99.3 | 21.0 |
| PDAC31_NS_Sa | 189,418,200 | 188,243,772 | 99.4 | 22.3 |
| PDAC32_Aj_Sa | 133,517,770 | 132,552,481 | 99.3 | 16.1 |
| PDAC33_Di_Ua | 68,469,304  | 68,073,960  | 99.4 | 8.3  |
| PDAC34_He_Ua | 94,791,162  | 94,297,142  | 99.5 | 11.5 |
| PDAC35_Hi_Ua | 34,479,912  | 34,293,353  | 99.5 | 4.7  |
| PDAC36_Fa_Ua | 173,990,458 | 172,677,258 | 99.2 | 20.8 |
| PDAC37_Lu_Ua | 156,410,544 | 155,327,741 | 99.3 | 18.4 |
| PDAC38_Ab_Ua | 265,572,440 | 263,586,381 | 99.3 | 30.7 |
| PDAC39_Na_Ua | 93,130,718  | 92,349,463  | 99.2 | 11.9 |
| PDAC4_Ra_Mo  | 74,658,968  | 72,429,219  | 97.0 | 9.1  |
| PDAC40_Ma_Iq | 99,763,240  | 99,140,014  | 99.4 | 12.0 |
| PDAC41_Kw_Iq | 185,509,412 | 184,331,712 | 99.4 | 21.9 |
| PDAC42_Ka_Iq | 165,266,340 | 164,037,488 | 99.3 | 19.5 |
| PDAC43_Su_Iq | 164,736,418 | 163,688,120 | 99.4 | 19.7 |
| PDAC44_UH_Iq | 110,973,284 | 110,053,615 | 99.2 | 13.5 |
| PDAC45_UB_Iq | 79,016,884  | 78,290,182  | 99.1 | 9.8  |
| PDAC46_EA_Iq | 73,217,444  | 72,595,841  | 99.2 | 9.0  |
| PDAC47_AA_Iq | 76,291,000  | 75,717,851  | 99.2 | 9.6  |
| PDAC48_Eb_Iq | 80,351,780  | 79,543,999  | 99.0 | 9.9  |
| PDAC49_Da_Iq | 70,103,050  | 69,590,999  | 99.3 | 8.8  |
| PDAC5_Ji_Mo  | 64,726,936  | 63,990,945  | 98.9 | 8.1  |
| PDAC50_Si_Iq | 112,156,326 | 111,025,337 | 99.0 | 13.6 |
| PDAC51_Ks_Iq | 173,421,696 | 172,358,512 | 99.4 | 23.3 |
| PDAC52_Ha_Iq | 169,972,110 | 168,996,581 | 99.4 | 22.8 |
| PDAC53_Za_Iq | 299,718,590 | 293,159,247 | 97.8 | 34.2 |
| PDAC54_Am_Iq | 359,465,904 | 352,576,817 | 98.1 | 40.9 |
| PDAC55_Ma_Iq | 79,554,634  | 78,925,401  | 99.2 | 9.9  |
| PDAC56_Br_Iq | 155,582,104 | 154,418,662 | 99.3 | 18.4 |
| PDAC57_Ka_In | 58,262,680  | 57,995,381  | 99.5 | 7.4  |
| PDAC58_Ma_In | 252,034,528 | 250,194,806 | 99.3 | 29.6 |
| PDAC59_Pi_In | 106,153,662 | 105,390,839 | 99.3 | 12.9 |
| PDAC6_Br_Mo  | 67,285,164  | 66,654,559  | 99.1 | 8.5  |
| PDAC60_Ra_In | 83,820,956  | 83,085,276  | 99.1 | 10.4 |
| PDAC61_Ka_Pa | 142,039,272 | 138,828,675 | 97.7 | 16.7 |
| PDAC62_De_Pa | 81,853,532  | 80,831,262  | 98.8 | 10.0 |
| PDAC63_NK_Pa | 135,997,284 | 131,027,284 | 96.3 | 15.7 |
| PDAC64_As_Pa | 163,090,956 | 160,655,952 | 98.5 | 19.3 |
| PDAC65_Ku_Pa | 158,207,914 | 156,464,858 | 98.9 | 18.9 |
| PDAC66_Be_Pa | 211,230,860 | 208,830,598 | 98.9 | 24.6 |



|               |             |             |      |      |
|---------------|-------------|-------------|------|------|
| PDAC68_KB_Pa  | 182,253,212 | 179,346,384 | 98.4 | 21.6 |
| PDAC69_Ga_Pa  | 76,628,818  | 75,886,964  | 99.0 | 9.6  |
| PDAC7_Az_Mo   | 142,790,544 | 141,545,499 | 99.1 | 17.1 |
| PDAC70_Ha_Pa  | 70,521,848  | 69,844,614  | 99.0 | 8.9  |
| PDAC71_Ot_Pa  | 64,498,294  | 63,752,197  | 98.8 | 8.0  |
| PDAC8_Fa_Mo   | 124,292,474 | 122,326,434 | 98.4 | 14.7 |
| PDAC803_Wi_Om | 83,398,814  | 82,833,524  | 99.3 | 11.1 |
| PDAC804_Wi_Om | 70,626,734  | 69,924,397  | 99.0 | 9.4  |
| PDAC805_Ja_Om | 74,799,190  | 74,344,114  | 99.4 | 9.9  |
| PDAC806_Wi_Om | 63,212,222  | 62,833,027  | 99.4 | 8.5  |
| PDAC807_Si_Eg | 91,056,090  | 90,424,595  | 99.3 | 12.0 |
| Methuselah    | 152,308,928 | 151,418,706 | 99.4 | 18.1 |
| PDAC9_Bi_Mo   | 190,405,508 | 187,377,696 | 98.4 | 22.0 |
| PREC2         | 82,238,884  | 81,055,410  | 98.6 | 11.2 |
| PSYL1         | 185,277,266 | 183,487,724 | 99.0 | 22.3 |
| PSYL2         | 178,945,780 | 177,312,053 | 99.1 | 21.5 |
| PSYL3         | 169,782,932 | 168,354,829 | 99.2 | 20.3 |
| PSYL4         | 188,981,576 | 187,206,228 | 99.1 | 22.7 |
| PSYL44        | 71,938,838  | 71,220,814  | 99.0 | 10.0 |
| PSYL5         | 192,403,206 | 190,714,457 | 99.1 | 22.6 |
| PSYL6         | 180,363,028 | 178,713,178 | 99.1 | 21.7 |
| PSYL7         | 179,608,912 | 178,058,712 | 99.1 | 21.2 |
| PTHE1         | 168,776,628 | 166,654,034 | 98.7 | 21.7 |
| PTHE11        | 187,574,316 | 185,210,867 | 98.7 | 26.2 |
| PTHE13        | 188,852,064 | 186,314,936 | 98.7 | 26.3 |
| PTHE15        | 188,829,858 | 185,926,905 | 98.5 | 26.2 |
| PTHE16        | 200,513,310 | 198,171,160 | 98.8 | 27.7 |
| PTHE19        | 180,548,836 | 178,201,122 | 98.7 | 25.1 |
| PTHE2         | 186,618,412 | 184,358,907 | 98.8 | 22.2 |
| PTHE21        | 190,144,102 | 187,890,377 | 98.8 | 26.4 |
| PTHE23        | 174,751,714 | 172,541,163 | 98.7 | 24.5 |
| PTHE25        | 198,198,222 | 195,811,479 | 98.8 | 27.5 |
| PTHE26        | 168,707,556 | 166,742,774 | 98.8 | 21.9 |
| PTHE27        | 211,708,886 | 209,190,604 | 98.8 | 27.8 |
| PTHE28        | 59,691,270  | 59,045,277  | 98.9 | 9.1  |
| PTHE29        | 56,456,840  | 55,824,818  | 98.9 | 8.8  |
| PTHE3         | 220,226,168 | 217,868,745 | 98.9 | 29.6 |
| PTHE4         | 198,200,168 | 196,013,962 | 98.9 | 26.2 |
| PTHE5         | 134,889,884 | 133,183,708 | 98.7 | 19.2 |
| PTHE9         | 163,077,408 | 161,232,727 | 98.9 | 22.7 |

---



**Table S3. Heterozygosity in date palms**

| <b>ID</b>     | <b>Mean H<sup>a</sup></b> | <b>SD H<sup>b</sup></b> |
|---------------|---------------------------|-------------------------|
| PDAC1_Ka_Mo   | 0.200297                  | 0.19055157              |
| PDAC10_Me_Mo  | 0.27332094                | 0.2398702               |
| PDAC100_Bo_Is | 0.25750061                | 0.23654027              |
| PDAC101_Ad_Is | 0.24104859                | 0.225161                |
| PDAC102_Ju_Is | 0.23141093                | 0.21964016              |
| PDAC103_Ur_Is | 0.25604435                | 0.23239818              |
| PDAC104_Jo_Is | 0.2550906                 | 0.23313845              |
| PDAC105_Ha_Is | 0.21780881                | 0.21114075              |
| PDAC11_Th_Mo  | 0.27646702                | 0.24162057              |
| PDAC12_Rh_Al  | 0.26092075                | 0.23468549              |
| PDAC13_Dn_Tu  | 0.25627849                | 0.2321452               |
| PDAC14_Al_Tu  | 0.27899395                | 0.24349829              |
| PDAC15_Bh_Tu  | 0.28754525                | 0.24481589              |
| PDAC17_Ab_Li  | 0.27211126                | 0.23971707              |
| PDAC18_Ta_Li  | 0.26948538                | 0.23976827              |
| PDAC19_Ha_Eg  | 0.16208026                | 0.15605693              |
| PDAC2_Kh_Mo   | 0.28065715                | 0.23468901              |
| PDAC20_Ba_Eg  | 0.19437373                | 0.17939066              |
| PDAC21_Ha_Eg  | 0.23667846                | 0.22284738              |
| PDAC22_Sa_Eg  | 0.24052955                | 0.22352226              |
| PDAC23_Sa_Eg  | 0.23203156                | 0.21839205              |
| PDAC24_Za_Eg  | 0.234884                  | 0.2207314               |
| PDAC25_Ja_Su  | 0.222365                  | 0.21222625              |
| PDAC26_Ch_Sa  | 0.19638698                | 0.19199911              |
| PDAC27_Hi_Sa  | 0.13114107                | 0.1258111               |
| PDAC28_Ro_Sa  | 0.21360565                | 0.20518711              |
| PDAC29_Sh_Sa  | 0.20796644                | 0.20377121              |
| PDAC3_Bk_Mo   | 0.21472788                | 0.19921558              |
| PDAC30_Ke_Sa  | 0.20776517                | 0.20415663              |
| PDAC31_NS_Sa  | 0.20809791                | 0.20630561              |
| PDAC32_Aj_Sa  | 0.20381131                | 0.20250877              |
| PDAC33_Di_Ua  | 0.1675022                 | 0.16586321              |
| PDAC34_He_Ua  | 0.19352745                | 0.19098859              |
| PDAC35_Hi_Ua  | 0.10070154                | 0.09511435              |
| PDAC36_Fa_Ua  | 0.19950071                | 0.20205376              |
| PDAC37_Lu_Ua  | 0.20792227                | 0.20488339              |
| PDAC38_Ab_Ua  | 0.20902782                | 0.20416256              |

|               |            |            |
|---------------|------------|------------|
| PDAC39_Na_Ua  | 0.17139712 | 0.17016561 |
| PDAC4_Ra_Mo   | 0.23821837 | 0.20637217 |
| PDAC40_Ma_Iq  | 0.19359936 | 0.18808793 |
| PDAC41_Kw_Iq  | 0.20537616 | 0.2030457  |
| PDAC42_Ka_Iq  | 0.205141   | 0.2022006  |
| PDAC43_Su_Iq  | 0.20604089 | 0.20292724 |
| PDAC44_UH_Iq  | 0.20054049 | 0.19562735 |
| PDAC45_UB_Iq  | 0.19689207 | 0.19059286 |
| PDAC46_EA_Iq  | 0.19993956 | 0.19328168 |
| PDAC47_AA_Iq  | 0.19184613 | 0.18773883 |
| PDAC48_Eb_Iq  | 0.19979742 | 0.19158806 |
| PDAC49_Da_Iq  | 0.19423464 | 0.18768937 |
| PDAC5_Ji_Mo   | 0.2329454  | 0.20903128 |
| PDAC50_Si_Iq  | 0.20487146 | 0.19778536 |
| PDAC51_Ks_Iq  | 0.2101651  | 0.2047746  |
| PDAC52_Ha_Iq  | 0.21505961 | 0.21030486 |
| PDAC53_Za_Iq  | 0.21537373 | 0.2080215  |
| PDAC54_Am_Iq  | 0.21175801 | 0.207616   |
| PDAC55_Ma_Iq  | 0.19331466 | 0.1896056  |
| PDAC56_Br_Iq  | 0.21708809 | 0.21199427 |
| PDAC57_Ka_In  | 0.12306364 | 0.12011909 |
| PDAC58_Ma_In  | 0.20761323 | 0.20492149 |
| PDAC59_Pi_In  | 0.20444773 | 0.19735923 |
| PDAC6_Br_Mo   | 0.21759102 | 0.19845778 |
| PDAC60_Ra_In  | 0.20172884 | 0.19325068 |
| PDAC61_Ka_Pa  | 0.20653305 | 0.20244752 |
| PDAC62_De_Pa  | 0.19435102 | 0.19125316 |
| PDAC63_NK_Pa  | 0.20725251 | 0.20324726 |
| PDAC64_As_Pa  | 0.24155817 | 0.22307625 |
| PDAC65_Ku_Pa  | 0.21194653 | 0.20808883 |
| PDAC66_Be_Pa  | 0.21378957 | 0.206338   |
| PDAC68_KB_Pa  | 0.21439602 | 0.20679358 |
| PDAC69_Ga_Pa  | 0.1871054  | 0.18819124 |
| PDAC7_Az_Mo   | 0.2685847  | 0.23701228 |
| PDAC70_Ha_Pa  | 0.19282504 | 0.18675087 |
| PDAC71_Ot_Pa  | 0.18389018 | 0.17741367 |
| PDAC8_Fa_Mo   | 0.27994664 | 0.2335126  |
| PDAC803_Wi_Om | 0.18961433 | 0.19102521 |
| PDAC804_Wi_Om | 0.18055233 | 0.17798511 |
| PDAC805_Ja_Om | 0.19325963 | 0.18979133 |

|               |            |            |
|---------------|------------|------------|
| PDAC806_Wi_Om | 0.18182892 | 0.17946364 |
| PDAC807_Si_Eg | 0.22769753 | 0.21474822 |
| PDAC810_Me_Is | 0.20477883 | 0.20262644 |
| PDAC9_Bi_Mo   | 0.25958485 | 0.23961948 |

<sup>a</sup>The proportion of heterozygote sites was calculated in non-overlapping sliding windows and the mean H reports the average across windows; <sup>b</sup>standard deviation of H

**Table S4. Summary of *D*-tests of admixture in date palm and wild *Phoenix* species<sup>a</sup>**

| <b>W</b>     | <b>Y</b>              | <b>Z</b>              | <b>D<sup>b</sup></b> | <b>SE<sup>c</sup></b> | <b>Zsc<sup>d</sup></b> | <b>BABA<sup>e</sup></b> | <b>ABBA<sup>e</sup></b> | <b>nsnps<sup>f</sup></b> |
|--------------|-----------------------|-----------------------|----------------------|-----------------------|------------------------|-------------------------|-------------------------|--------------------------|
| Adam         | <i>P. theophrasti</i> | <i>P. canariensis</i> | 0.3119               | 0.031971              | 9.756                  | 70386                   | 37019                   | 5087997                  |
| Adam         | <i>P. theophrasti</i> | <i>P. reclinata</i>   | 0.3028               | 0.031649              | 9.566                  | 58520                   | 31402                   | 4184633                  |
| Boaz         | <i>P. theophrasti</i> | <i>P. canariensis</i> | 0.4675               | 0.031782              | 14.71                  | 102376                  | 37297                   | 5088261                  |
| Boaz         | <i>P. theophrasti</i> | <i>P. reclinata</i>   | 0.4665               | 0.033548              | 13.906                 | 86053                   | 31437                   | 4184860                  |
| Hannah       | <i>P. theophrasti</i> | <i>P. canariensis</i> | 0.0915               | 0.029572              | 3.095                  | 44511                   | 37109                   | 5090309                  |
| Hannah       | <i>P. theophrasti</i> | <i>P. reclinata</i>   | 0.0922               | 0.029568              | 3.119                  | 37905                   | 31556                   | 4186577                  |
| Jonah        | <i>P. theophrasti</i> | <i>P. canariensis</i> | 0.3983               | 0.032278              | 12.341                 | 88564                   | 38231                   | 5088273                  |
| Jonah        | <i>P. theophrasti</i> | <i>P. reclinata</i>   | 0.3952               | 0.032116              | 12.304                 | 74849                   | 32550                   | 4184999                  |
| Judith       | <i>P. theophrasti</i> | <i>P. canariensis</i> | 0.2337               | 0.039366              | 5.938                  | 62766                   | 39118                   | 5082287                  |
| Judith       | <i>P. theophrasti</i> | <i>P. reclinata</i>   | 0.2322               | 0.04088               | 5.68                   | 53276                   | 33320                   | 4180009                  |
| Methuselah   | <i>P. theophrasti</i> | <i>P. canariensis</i> | -0.013               | 0.009277              | -1.407                 | 34080                   | 34979                   | 5045765                  |
| Methuselah   | <i>P. theophrasti</i> | <i>P. reclinata</i>   | -0.0094              | 0.009204              | -1.026                 | 29060                   | 29614                   | 4150821                  |
| Uriel        | <i>P. theophrasti</i> | <i>P. canariensis</i> | 0.381                | 0.03564               | 10.691                 | 83752                   | 37677                   | 5088367                  |
| Uriel        | <i>P. theophrasti</i> | <i>P. reclinata</i>   | 0.3722               | 0.036379              | 10.233                 | 70126                   | 32198                   | 4184942                  |
| PDAC1_Ka_Mo  | <i>P. theophrasti</i> | <i>P. canariensis</i> | 0.5248               | 0.022705              | 23.114                 | 86307                   | 26964                   | 3496335                  |
| PDAC1_Ka_Mo  | <i>P. theophrasti</i> | <i>P. reclinata</i>   | 0.5206               | 0.02268               | 22.954                 | 72570                   | 22932                   | 2896189                  |
| PDAC10_Me_Mo | <i>P. theophrasti</i> | <i>P. canariensis</i> | 0.5119               | 0.027551              | 18.58                  | 113916                  | 36895                   | 4933406                  |
| PDAC10_Me_Mo | <i>P. theophrasti</i> | <i>P. reclinata</i>   | 0.5032               | 0.027785              | 18.111                 | 95153                   | 31540                   | 4062069                  |
| PDAC11_Th_Mo | <i>P. theophrasti</i> | <i>P. canariensis</i> | 0.5419               | 0.023633              | 22.93                  | 125268                  | 37310                   | 5016174                  |
| PDAC11_Th_Mo | <i>P. theophrasti</i> | <i>P. reclinata</i>   | 0.5331               | 0.024727              | 21.56                  | 105100                  | 32090                   | 4125410                  |
| PDAC12_Rh_Al | <i>P. theophrasti</i> | <i>P. canariensis</i> | 0.4508               | 0.027686              | 16.282                 | 95686                   | 36321                   | 5031448                  |
| PDAC12_Rh_Al | <i>P. theophrasti</i> | <i>P. reclinata</i>   | 0.4458               | 0.02863               | 15.572                 | 80073                   | 30776                   | 4137459                  |
| PDAC13_Dn_Tu | <i>P. theophrasti</i> | <i>P. canariensis</i> | 0.4301               | 0.027069              | 15.89                  | 93585                   | 37381                   | 5000681                  |
| PDAC13_Dn_Tu | <i>P. theophrasti</i> | <i>P. reclinata</i>   | 0.4222               | 0.026083              | 16.186                 | 78703                   | 32049                   | 4112542                  |
| PDAC14_Al_Tu | <i>P. theophrasti</i> | <i>P. canariensis</i> | 0.5549               | 0.022104              | 25.102                 | 130612                  | 37484                   | 5013359                  |
| PDAC14_Al_Tu | <i>P. theophrasti</i> | <i>P. reclinata</i>   | 0.5506               | 0.022858              | 24.087                 | 109623                  | 31854                   | 4125405                  |

|              |                       |                       |        |          |        |        |       |         |
|--------------|-----------------------|-----------------------|--------|----------|--------|--------|-------|---------|
| PDAC15_Bh_Tu | <i>P. theophrasti</i> | <i>P. canariensis</i> | 0.5924 | 0.021551 | 27.489 | 143329 | 36781 | 5028671 |
| PDAC15_Bh_Tu | <i>P. theophrasti</i> | <i>P. reclinata</i>   | 0.5915 | 0.021768 | 27.174 | 119655 | 30790 | 4137668 |
| PDAC17_Ab_Li | <i>P. theophrasti</i> | <i>P. canariensis</i> | 0.5424 | 0.030183 | 17.971 | 125462 | 37378 | 5011772 |
| PDAC17_Ab_Li | <i>P. theophrasti</i> | <i>P. reclinata</i>   | 0.5398 | 0.029894 | 18.058 | 105325 | 31603 | 4125286 |
| PDAC18-Ta_Li | <i>P. theophrasti</i> | <i>P. canariensis</i> | 0.4746 | 0.029663 | 15.999 | 107939 | 38585 | 5079573 |
| PDAC18-Ta_Li | <i>P. theophrasti</i> | <i>P. reclinata</i>   | 0.4726 | 0.030092 | 15.706 | 91252  | 32784 | 4178192 |
| PDAC19_Ha_Eg | <i>P. theophrasti</i> | <i>P. canariensis</i> | 0.409  | 0.028576 | 14.314 | 48971  | 20597 | 2388140 |
| PDAC19_Ha_Eg | <i>P. theophrasti</i> | <i>P. reclinata</i>   | 0.3983 | 0.02833  | 14.06  | 41508  | 17905 | 1988090 |
| PDAC2_Kh_Mo  | <i>P. theophrasti</i> | <i>P. canariensis</i> | 0.5835 | 0.018827 | 30.994 | 130365 | 34351 | 4739752 |
| PDAC2_Kh_Mo  | <i>P. theophrasti</i> | <i>P. reclinata</i>   | 0.5786 | 0.019075 | 30.331 | 108930 | 29135 | 3906173 |
| PDAC20_Ba_Eg | <i>P. theophrasti</i> | <i>P. canariensis</i> | 0.4148 | 0.030993 | 13.383 | 64790  | 26882 | 3367971 |
| PDAC20_Ba_Eg | <i>P. theophrasti</i> | <i>P. reclinata</i>   | 0.4056 | 0.030458 | 13.316 | 54274  | 23014 | 2789897 |
| PDAC21_Ha_Eg | <i>P. theophrasti</i> | <i>P. canariensis</i> | 0.2908 | 0.041848 | 6.948  | 67028  | 36998 | 5090322 |
| PDAC21_Ha_Eg | <i>P. theophrasti</i> | <i>P. reclinata</i>   | 0.2877 | 0.042793 | 6.722  | 56646  | 31481 | 4186568 |
| PDAC22_Sa_Eg | <i>P. theophrasti</i> | <i>P. canariensis</i> | 0.3034 | 0.039478 | 7.684  | 69884  | 37510 | 5089655 |
| PDAC22_Sa_Eg | <i>P. theophrasti</i> | <i>P. reclinata</i>   | 0.3012 | 0.039316 | 7.66   | 59087  | 31863 | 4186039 |
| PDAC23_Sa_Eg | <i>P. theophrasti</i> | <i>P. canariensis</i> | 0.2749 | 0.033842 | 8.124  | 64863  | 36983 | 4952832 |
| PDAC23_Sa_Eg | <i>P. theophrasti</i> | <i>P. reclinata</i>   | 0.2704 | 0.032417 | 8.342  | 54376  | 31299 | 4071369 |
| PDAC24_Za_Eg | <i>P. theophrasti</i> | <i>P. canariensis</i> | 0.3111 | 0.036676 | 8.483  | 71425  | 37661 | 4943903 |
| PDAC24_Za_Eg | <i>P. theophrasti</i> | <i>P. reclinata</i>   | 0.303  | 0.036256 | 8.359  | 60009  | 32203 | 4068560 |
| PDAC25_Ja_Su | <i>P. theophrasti</i> | <i>P. canariensis</i> | 0.1173 | 0.031267 | 3.752  | 50329  | 39825 | 5036738 |
| PDAC25_Ja_Su | <i>P. theophrasti</i> | <i>P. reclinata</i>   | 0.1289 | 0.0289   | 4.461  | 43113  | 33314 | 4145012 |
| PDAC3_Bk_Mo  | <i>P. theophrasti</i> | <i>P. canariensis</i> | 0.5122 | 0.024014 | 21.331 | 90027  | 29112 | 4128984 |
| PDAC3_Bk_Mo  | <i>P. theophrasti</i> | <i>P. reclinata</i>   | 0.5015 | 0.024212 | 20.714 | 75335  | 25068 | 3414094 |
| PDAC4_Ra_Mo  | <i>P. theophrasti</i> | <i>P. canariensis</i> | 0.5264 | 0.024591 | 21.407 | 95281  | 29643 | 3970236 |
| PDAC4_Ra_Mo  | <i>P. theophrasti</i> | <i>P. reclinata</i>   | 0.5191 | 0.024876 | 20.867 | 80555  | 25567 | 3284569 |
| PDAC5_Ji_Mo  | <i>P. theophrasti</i> | <i>P. canariensis</i> | 0.4945 | 0.024454 | 20.222 | 83864  | 28432 | 3603358 |
| PDAC5_Ji_Mo  | <i>P. theophrasti</i> | <i>P. reclinata</i>   | 0.488  | 0.025149 | 19.405 | 70616  | 24355 | 2988238 |
| PDAC6_Br_Mo  | <i>P. theophrasti</i> | <i>P. canariensis</i> | 0.543  | 0.026091 | 20.813 | 95523  | 28385 | 3699658 |

|               |                       |                       |         |          |         |        |        |         |
|---------------|-----------------------|-----------------------|---------|----------|---------|--------|--------|---------|
| PDAC6_Br_Mo   | <i>P. theophrasti</i> | <i>P. reclinata</i>   | 0.5314  | 0.025883 | 20.531  | 80062  | 24574  | 3065333 |
| PDAC7_Az_Mo   | <i>P. theophrasti</i> | <i>P. canariensis</i> | 0.5575  | 0.024376 | 22.87   | 124884 | 35587  | 4919509 |
| PDAC7_Az_Mo   | <i>P. theophrasti</i> | <i>P. reclinata</i>   | 0.5515  | 0.024828 | 22.215  | 104657 | 30334  | 4050963 |
| PDAC8_Fa_Mo   | <i>P. theophrasti</i> | <i>P. canariensis</i> | 0.5508  | 0.022071 | 24.957  | 120881 | 35091  | 4759397 |
| PDAC8_Fa_Mo   | <i>P. theophrasti</i> | <i>P. reclinata</i>   | 0.5458  | 0.021648 | 25.212  | 101908 | 30006  | 3922119 |
| PDAC807_Si_Eg | <i>P. theophrasti</i> | <i>P. canariensis</i> | 0.2781  | 0.033951 | 8.192   | 62908  | 35623  | 4729474 |
| PDAC807_Si_Eg | <i>P. theophrasti</i> | <i>P. reclinata</i>   | 0.2746  | 0.032371 | 8.483   | 52973  | 30217  | 3901541 |
| PDAC9_Bi_Mo   | <i>P. theophrasti</i> | <i>P. canariensis</i> | 0.5245  | 0.026957 | 19.455  | 116119 | 36340  | 5014741 |
| PDAC9_Bi_Mo   | <i>P. theophrasti</i> | <i>P. reclinata</i>   | 0.5099  | 0.027817 | 18.332  | 96697  | 31480  | 4126416 |
| Adam          | <i>P. sylvestris</i>  | <i>P. canariensis</i> | -0.0987 | 0.014465 | -6.822  | 58779  | 71621  | 5079594 |
| Adam          | <i>P. sylvestris</i>  | <i>P. reclinata</i>   | -0.0986 | 0.014306 | -6.893  | 47174  | 57472  | 4177947 |
| Boaz          | <i>P. sylvestris</i>  | <i>P. canariensis</i> | -0.1802 | 0.018392 | -9.797  | 61877  | 89007  | 5079853 |
| Boaz          | <i>P. sylvestris</i>  | <i>P. reclinata</i>   | -0.1679 | 0.015833 | -10.605 | 49928  | 70034  | 4178168 |
| Hannah        | <i>P. sylvestris</i>  | <i>P. canariensis</i> | -0.027  | 0.011923 | -2.266  | 56458  | 59584  | 5081900 |
| Hannah        | <i>P. sylvestris</i>  | <i>P. reclinata</i>   | -0.0223 | 0.011177 | -1.995  | 45493  | 47562  | 4179885 |
| Jonah         | <i>P. sylvestris</i>  | <i>P. canariensis</i> | -0.1444 | 0.015505 | -9.316  | 61444  | 82147  | 5079865 |
| Jonah         | <i>P. sylvestris</i>  | <i>P. reclinata</i>   | -0.136  | 0.014802 | -9.191  | 49584  | 65164  | 4178308 |
| Judith        | <i>P. sylvestris</i>  | <i>P. canariensis</i> | -0.0856 | 0.016684 | -5.133  | 60089  | 71308  | 5073895 |
| Judith        | <i>P. sylvestris</i>  | <i>P. reclinata</i>   | -0.0806 | 0.01432  | -5.626  | 48438  | 56905  | 4173331 |
| Methuseah     | <i>P. sylvestris</i>  | <i>P. canariensis</i> | 0.0074  | 0.005857 | 1.26    | 52785  | 52011  | 5037383 |
| Methuseah     | <i>P. sylvestris</i>  | <i>P. reclinata</i>   | 0.0108  | 0.00705  | 1.536   | 42365  | 41457  | 4144148 |
| Uriel         | <i>P. sylvestris</i>  | <i>P. canariensis</i> | -0.1175 | 0.016803 | -6.991  | 61493  | 77825  | 5079959 |
| Uriel         | <i>P. sylvestris</i>  | <i>P. reclinata</i>   | -0.1152 | 0.016053 | -7.173  | 49392  | 62216  | 4178250 |
| PDAC1_Ka_Mo   | <i>P. sylvestris</i>  | <i>P. canariensis</i> | -0.2145 | 0.014882 | -14.412 | 44547  | 68840  | 3489628 |
| PDAC1_Ka_Mo   | <i>P. sylvestris</i>  | <i>P. reclinata</i>   | -0.2019 | 0.01446  | -13.961 | 36435  | 54839  | 2890864 |
| PDAC10_Me_Mo  | <i>P. sylvestris</i>  | <i>P. canariensis</i> | -0.1995 | 0.016013 | -12.458 | 61780  | 92516  | 4925133 |
| PDAC10_Me_Mo  | <i>P. sylvestris</i>  | <i>P. reclinata</i>   | -0.1946 | 0.015906 | -12.232 | 50065  | 74203  | 4055494 |
| PDAC11_Th_Mo  | <i>P. sylvestris</i>  | <i>P. canariensis</i> | -0.2359 | 0.018085 | -13.043 | 63350  | 102393 | 5007831 |
| PDAC11_Th_Mo  | <i>P. sylvestris</i>  | <i>P. reclinata</i>   | -0.228  | 0.015932 | -14.31  | 50887  | 80897  | 4118770 |



|              |                      |                       |         |          |         |       |        |         |
|--------------|----------------------|-----------------------|---------|----------|---------|-------|--------|---------|
| PDAC12_Rh_Al | <i>P. sylvestris</i> | <i>P. canariensis</i> | -0.1676 | 0.017957 | -9.334  | 59912 | 83991  | 5023085 |
| PDAC12_Rh_Al | <i>P. sylvestris</i> | <i>P. reclinata</i>   | -0.1581 | 0.016242 | -9.735  | 48142 | 66195  | 4130804 |
| PDAC13_Dn_Tu | <i>P. sylvestris</i> | <i>P. canariensis</i> | -0.1667 | 0.015813 | -10.544 | 60882 | 85203  | 4992361 |
| PDAC13_Dn_Tu | <i>P. sylvestris</i> | <i>P. reclinata</i>   | -0.1596 | 0.015603 | -10.228 | 49380 | 68102  | 4105920 |
| PDAC14_Al_Tu | <i>P. sylvestris</i> | <i>P. canariensis</i> | -0.2284 | 0.015566 | -14.673 | 64436 | 102520 | 5005015 |
| PDAC14_Al_Tu | <i>P. sylvestris</i> | <i>P. reclinata</i>   | -0.2137 | 0.014295 | -14.948 | 52269 | 80637  | 4118769 |
| PDAC15_Bh_Tu | <i>P. sylvestris</i> | <i>P. canariensis</i> | -0.2642 | 0.015112 | -17.481 | 63839 | 109612 | 5020338 |
| PDAC15_Bh_Tu | <i>P. sylvestris</i> | <i>P. reclinata</i>   | -0.2525 | 0.014839 | -17.015 | 52005 | 87088  | 4131041 |
| PDAC17_Ab_Li | <i>P. sylvestris</i> | <i>P. canariensis</i> | -0.2186 | 0.018689 | -11.697 | 63861 | 99514  | 5003433 |
| PDAC17_Ab_Li | <i>P. sylvestris</i> | <i>P. reclinata</i>   | -0.2052 | 0.018782 | -10.925 | 52091 | 78921  | 4118648 |
| PDAC18-Ta_Li | <i>P. sylvestris</i> | <i>P. canariensis</i> | -0.1795 | 0.01613  | -11.126 | 64129 | 92132  | 5071185 |
| PDAC18-Ta_Li | <i>P. sylvestris</i> | <i>P. reclinata</i>   | -0.1662 | 0.015489 | -10.728 | 52262 | 73053  | 4171518 |
| PDAC19_Ha_Eg | <i>P. sylvestris</i> | <i>P. canariensis</i> | -0.1408 | 0.013896 | -10.134 | 33114 | 43953  | 2383115 |
| PDAC19_Ha_Eg | <i>P. sylvestris</i> | <i>P. reclinata</i>   | -0.1346 | 0.013655 | -9.854  | 27062 | 35464  | 1984139 |
| PDAC2_Kh_Mo  | <i>P. sylvestris</i> | <i>P. canariensis</i> | -0.2401 | 0.013402 | -17.916 | 59509 | 97072  | 4731717 |
| PDAC2_Kh_Mo  | <i>P. sylvestris</i> | <i>P. reclinata</i>   | -0.2306 | 0.013339 | -17.288 | 48135 | 76955  | 3899769 |
| PDAC20_Ba_Eg | <i>P. sylvestris</i> | <i>P. canariensis</i> | -0.1422 | 0.014672 | -9.691  | 43312 | 57652  | 3361384 |
| PDAC20_Ba_Eg | <i>P. sylvestris</i> | <i>P. reclinata</i>   | -0.1406 | 0.015129 | -9.292  | 35056 | 46507  | 2784686 |
| PDAC21_Ha_Eg | <i>P. sylvestris</i> | <i>P. canariensis</i> | -0.0902 | 0.017113 | -5.273  | 58772 | 70390  | 5081915 |
| PDAC21_Ha_Eg | <i>P. sylvestris</i> | <i>P. reclinata</i>   | -0.0827 | 0.015561 | -5.313  | 47278 | 55775  | 4179877 |
| PDAC22_Sa_Eg | <i>P. sylvestris</i> | <i>P. canariensis</i> | -0.0942 | 0.017274 | -5.456  | 59944 | 72373  | 5081261 |
| PDAC22_Sa_Eg | <i>P. sylvestris</i> | <i>P. reclinata</i>   | -0.0861 | 0.01665  | -5.173  | 48320 | 57396  | 4179351 |
| PDAC23_Sa_Eg | <i>P. sylvestris</i> | <i>P. canariensis</i> | -0.0812 | 0.012874 | -6.311  | 58323 | 68623  | 4944566 |
| PDAC23_Sa_Eg | <i>P. sylvestris</i> | <i>P. reclinata</i>   | -0.0771 | 0.013424 | -5.745  | 46868 | 54688  | 4064787 |
| PDAC24_Za_Eg | <i>P. sylvestris</i> | <i>P. canariensis</i> | -0.0937 | 0.016376 | -5.719  | 60528 | 73005  | 4935673 |
| PDAC24_Za_Eg | <i>P. sylvestris</i> | <i>P. reclinata</i>   | -0.0891 | 0.015205 | -5.86   | 48630 | 58122  | 4062022 |
| PDAC25_Ja_Su | <i>P. sylvestris</i> | <i>P. canariensis</i> | -0.0224 | 0.01035  | -2.166  | 60882 | 63667  | 5028384 |
| PDAC25_Ja_Su | <i>P. sylvestris</i> | <i>P. reclinata</i>   | -0.014  | 0.011707 | -1.2    | 49048 | 50437  | 4138354 |
| PDAC3_Bk_Mo  | <i>P. sylvestris</i> | <i>P. canariensis</i> | -0.1952 | 0.014715 | -13.264 | 48891 | 72571  | 4121534 |

|               |                      |                       |         |          |         |       |       |         |
|---------------|----------------------|-----------------------|---------|----------|---------|-------|-------|---------|
| PDAC3_Bk_Mo   | <i>P. sylvestris</i> | <i>P. reclinata</i>   | -0.1877 | 0.01501  | -12.506 | 39871 | 58272 | 3408171 |
| PDAC4_Ra_Mo   | <i>P. sylvestris</i> | <i>P. canariensis</i> | -0.207  | 0.015297 | -13.531 | 49594 | 75443 | 3962892 |
| PDAC4_Ra_Mo   | <i>P. sylvestris</i> | <i>P. reclinata</i>   | -0.1969 | 0.01497  | -13.152 | 40228 | 59921 | 3278689 |
| PDAC5_Ji_Mo   | <i>P. sylvestris</i> | <i>P. canariensis</i> | -0.1865 | 0.014281 | -13.057 | 47272 | 68915 | 3596629 |
| PDAC5_Ji_Mo   | <i>P. sylvestris</i> | <i>P. reclinata</i>   | -0.1764 | 0.013081 | -13.483 | 38429 | 54867 | 2982897 |
| PDAC6_Br_Mo   | <i>P. sylvestris</i> | <i>P. canariensis</i> | -0.2259 | 0.016589 | -13.615 | 47251 | 74770 | 3692735 |
| PDAC6_Br_Mo   | <i>P. sylvestris</i> | <i>P. reclinata</i>   | -0.2237 | 0.017002 | -13.156 | 38413 | 60503 | 3059850 |
| PDAC7_Az_Mo   | <i>P. sylvestris</i> | <i>P. canariensis</i> | -0.224  | 0.015445 | -14.502 | 61335 | 96683 | 4911307 |
| PDAC7_Az_Mo   | <i>P. sylvestris</i> | <i>P. reclinata</i>   | -0.215  | 0.01544  | -13.924 | 49655 | 76806 | 4044434 |
| PDAC8_Fa_Mo   | <i>P. sylvestris</i> | <i>P. canariensis</i> | -0.2297 | 0.014838 | -15.479 | 59039 | 94200 | 4751429 |
| PDAC8_Fa_Mo   | <i>P. sylvestris</i> | <i>P. reclinata</i>   | -0.2173 | 0.014935 | -14.55  | 47874 | 74419 | 3915788 |
| PDAC807_Si_Eg | <i>P. sylvestris</i> | <i>P. canariensis</i> | -0.083  | 0.012842 | -6.461  | 56186 | 66338 | 4721397 |
| PDAC807_Si_Eg | <i>P. sylvestris</i> | <i>P. reclinata</i>   | -0.0778 | 0.013501 | -5.76   | 45418 | 53066 | 3895120 |
| PDAC9_Bi_Mo   | <i>P. sylvestris</i> | <i>P. canariensis</i> | -0.2171 | 0.018262 | -11.885 | 61428 | 95413 | 5006443 |
| PDAC9_Bi_Mo   | <i>P. sylvestris</i> | <i>P. reclinata</i>   | -0.2149 | 0.017829 | -12.051 | 49435 | 76432 | 4119804 |

<sup>a</sup>The test was performed using *admixr* with the following tree, as stated in the Methods: (((W, X), Y), Z), where X is West Asian date palms; <sup>b</sup>D-statistic value; <sup>c</sup>standard error of the *D*-statistic calculated using the block jackknife; <sup>d</sup>Z-score is the number of standard errors *D* is from 0; <sup>e</sup>BABA and ABBA are the counts of observed site patterns; <sup>f</sup>number of SNPs used for a given calculation

**Table S5. Summary of f4-statistics for testing of admixture in date palm and wild *Phoenix* species<sup>a</sup>**

| <b>W</b>     | <b>Y</b>              | <b>Z</b>              | <b><math>f_4^b</math></b> | <b>SE<sup>c</sup></b> | <b>Zsc<sup>d</sup></b> | <b>BABA<sup>e</sup></b> | <b>ABBA<sup>e</sup></b> | <b>Nsnps<sup>f</sup></b> |
|--------------|-----------------------|-----------------------|---------------------------|-----------------------|------------------------|-------------------------|-------------------------|--------------------------|
| Boaz         | <i>P. theophrasti</i> | <i>P. canariensis</i> | 0.0128                    | 0.0015                | 8.505                  | 102376                  | 37297                   | 5088261                  |
| Boaz         | <i>P. theophrasti</i> | <i>P. reclinata</i>   | 0.0131                    | 0.00159               | 8.209                  | 86053                   | 31437                   | 4184860                  |
| Adam         | <i>P. theophrasti</i> | <i>P. canariensis</i> | 0.0066                    | 0.00093               | 7.045                  | 70386                   | 37019                   | 5087997                  |
| Adam         | <i>P. theophrasti</i> | <i>P. reclinata</i>   | 0.0065                    | 0.00092               | 7.022                  | 58520                   | 31402                   | 4184633                  |
| Judith       | <i>P. theophrasti</i> | <i>P. canariensis</i> | 0.0047                    | 0.00097               | 4.79                   | 62766                   | 39118                   | 5082287                  |
| Judith       | <i>P. theophrasti</i> | <i>P. reclinata</i>   | 0.0048                    | 0.00104               | 4.602                  | 53276                   | 33320                   | 4180009                  |
| Uriel        | <i>P. theophrasti</i> | <i>P. canariensis</i> | 0.0091                    | 0.00126               | 7.21                   | 83752                   | 37677                   | 5088367                  |
| Uriel        | <i>P. theophrasti</i> | <i>P. reclinata</i>   | 0.0091                    | 0.00128               | 7.074                  | 70126                   | 32198                   | 4184942                  |
| Jonah        | <i>P. theophrasti</i> | <i>P. canariensis</i> | 0.0099                    | 0.00123               | 8.017                  | 88564                   | 38231                   | 5088273                  |
| Jonah        | <i>P. theophrasti</i> | <i>P. reclinata</i>   | 0.0101                    | 0.00125               | 8.104                  | 74849                   | 32550                   | 4184999                  |
| Hannah       | <i>P. theophrasti</i> | <i>P. canariensis</i> | 0.0015                    | 0.00051               | 2.847                  | 44511                   | 37109                   | 5090309                  |
| Hannah       | <i>P. theophrasti</i> | <i>P. reclinata</i>   | 0.0015                    | 0.00053               | 2.87                   | 37905                   | 31556                   | 4186577                  |
| Methuselah   | <i>P. theophrasti</i> | <i>P. canariensis</i> | -0.0002                   | 0.00013               | -1.4                   | 34080                   | 34979                   | 5045765                  |
| Methuselah   | <i>P. theophrasti</i> | <i>P. reclinata</i>   | -0.0001                   | 0.00013               | -1.026                 | 29060                   | 29614                   | 4150821                  |
| PDAC1_Ka_Mo  | <i>P. theophrasti</i> | <i>P. canariensis</i> | 0.017                     | 0.00141               | 12.015                 | 86307                   | 26964                   | 3496335                  |
| PDAC1_Ka_Mo  | <i>P. theophrasti</i> | <i>P. reclinata</i>   | 0.0171                    | 0.00142               | 12.059                 | 72570                   | 22932                   | 2896189                  |
| PDAC10_Me_Mo | <i>P. theophrasti</i> | <i>P. canariensis</i> | 0.0156                    | 0.00153               | 10.233                 | 113916                  | 36895                   | 4933406                  |
| PDAC10_Me_Mo | <i>P. theophrasti</i> | <i>P. reclinata</i>   | 0.0157                    | 0.00151               | 10.353                 | 95153                   | 31540                   | 4062069                  |
| PDAC11_Th_Mo | <i>P. theophrasti</i> | <i>P. canariensis</i> | 0.0175                    | 0.00143               | 12.247                 | 125268                  | 37310                   | 5016174                  |
| PDAC11_Th_Mo | <i>P. theophrasti</i> | <i>P. reclinata</i>   | 0.0177                    | 0.00151               | 11.749                 | 105100                  | 32090                   | 4125410                  |
| PDAC12_Rh_Al | <i>P. theophrasti</i> | <i>P. canariensis</i> | 0.0118                    | 0.0012                | 9.875                  | 95686                   | 36321                   | 5031448                  |
| PDAC12_Rh_Al | <i>P. theophrasti</i> | <i>P. reclinata</i>   | 0.0119                    | 0.00123               | 9.683                  | 80073                   | 30776                   | 4137459                  |
| PDAC13_Dn_Tu | <i>P. theophrasti</i> | <i>P. canariensis</i> | 0.0112                    | 0.00112               | 9.996                  | 93585                   | 37381                   | 5000681                  |
| PDAC13_Dn_Tu | <i>P. theophrasti</i> | <i>P. reclinata</i>   | 0.0113                    | 0.00113               | 10.088                 | 78703                   | 32049                   | 4112542                  |
| PDAC14_Al_Tu | <i>P. theophrasti</i> | <i>P. canariensis</i> | 0.0186                    | 0.00148               | 12.594                 | 130612                  | 37484                   | 5013359                  |
| PDAC14_Al_Tu | <i>P. theophrasti</i> | <i>P. reclinata</i>   | 0.0189                    | 0.00154               | 12.281                 | 109623                  | 31854                   | 4125405                  |

|              |                       |                       |        |         |        |        |       |         |
|--------------|-----------------------|-----------------------|--------|---------|--------|--------|-------|---------|
| PDAC15_Bh_Tu | <i>P. theophrasti</i> | <i>P. canariensis</i> | 0.0212 | 0.00161 | 13.146 | 143329 | 36781 | 5028671 |
| PDAC15_Bh_Tu | <i>P. theophrasti</i> | <i>P. reclinata</i>   | 0.0215 | 0.00164 | 13.135 | 119655 | 30790 | 4137668 |
| PDAC17_Ab_Li | <i>P. theophrasti</i> | <i>P. canariensis</i> | 0.0176 | 0.00187 | 9.423  | 125462 | 37378 | 5011772 |
| PDAC17_Ab_Li | <i>P. theophrasti</i> | <i>P. reclinata</i>   | 0.0179 | 0.00186 | 9.616  | 105325 | 31603 | 4125286 |
| PDAC18-Ta_Li | <i>P. theophrasti</i> | <i>P. canariensis</i> | 0.0137 | 0.00144 | 9.513  | 107939 | 38585 | 5079573 |
| PDAC18-Ta_Li | <i>P. theophrasti</i> | <i>P. reclinata</i>   | 0.014  | 0.00147 | 9.501  | 91252  | 32784 | 4178192 |
| PDAC19_Ha_Eg | <i>P. theophrasti</i> | <i>P. canariensis</i> | 0.0119 | 0.00132 | 9.027  | 48971  | 20597 | 2388140 |
| PDAC19_Ha_Eg | <i>P. theophrasti</i> | <i>P. reclinata</i>   | 0.0119 | 0.0013  | 9.158  | 41508  | 17905 | 1988090 |
| PDAC2_Kh_Mo  | <i>P. theophrasti</i> | <i>P. canariensis</i> | 0.0203 | 0.00137 | 14.841 | 130365 | 34351 | 4739752 |
| PDAC2_Kh_Mo  | <i>P. theophrasti</i> | <i>P. reclinata</i>   | 0.0204 | 0.00138 | 14.856 | 108930 | 29135 | 3906173 |
| PDAC20_Ba_Eg | <i>P. theophrasti</i> | <i>P. canariensis</i> | 0.0113 | 0.0013  | 8.651  | 64790  | 26882 | 3367971 |
| PDAC20_Ba_Eg | <i>P. theophrasti</i> | <i>P. reclinata</i>   | 0.0112 | 0.00126 | 8.884  | 54274  | 23014 | 2789897 |
| PDAC21_Ha_Eg | <i>P. theophrasti</i> | <i>P. canariensis</i> | 0.0059 | 0.00114 | 5.164  | 67028  | 36998 | 5090322 |
| PDAC21_Ha_Eg | <i>P. theophrasti</i> | <i>P. reclinata</i>   | 0.006  | 0.00119 | 5.048  | 56646  | 31481 | 4186568 |
| PDAC22_Sa_Eg | <i>P. theophrasti</i> | <i>P. canariensis</i> | 0.0064 | 0.00114 | 5.602  | 69884  | 37510 | 5089655 |
| PDAC22_Sa_Eg | <i>P. theophrasti</i> | <i>P. reclinata</i>   | 0.0065 | 0.00116 | 5.623  | 59087  | 31863 | 4186039 |
| PDAC23_Sa_Eg | <i>P. theophrasti</i> | <i>P. canariensis</i> | 0.0056 | 0.00089 | 6.319  | 64863  | 36983 | 4952832 |
| PDAC23_Sa_Eg | <i>P. theophrasti</i> | <i>P. reclinata</i>   | 0.0057 | 0.00087 | 6.544  | 54376  | 31299 | 4071369 |
| PDAC24_Za_Eg | <i>P. theophrasti</i> | <i>P. canariensis</i> | 0.0068 | 0.0011  | 6.211  | 71425  | 37661 | 4943903 |
| PDAC24_Za_Eg | <i>P. theophrasti</i> | <i>P. reclinata</i>   | 0.0068 | 0.0011  | 6.189  | 60009  | 32203 | 4068560 |
| PDAC25_Ja_Su | <i>P. theophrasti</i> | <i>P. canariensis</i> | 0.0021 | 0.00061 | 3.421  | 50329  | 39825 | 5036738 |
| PDAC25_Ja_Su | <i>P. theophrasti</i> | <i>P. reclinata</i>   | 0.0024 | 0.00059 | 4.021  | 43113  | 33314 | 4145012 |
| PDAC3_Bk_Mo  | <i>P. theophrasti</i> | <i>P. canariensis</i> | 0.0148 | 0.00129 | 11.464 | 90027  | 29112 | 4128984 |
| PDAC3_Bk_Mo  | <i>P. theophrasti</i> | <i>P. reclinata</i>   | 0.0147 | 0.00127 | 11.59  | 75335  | 25068 | 3414094 |
| PDAC4_Ra_Mo  | <i>P. theophrasti</i> | <i>P. canariensis</i> | 0.0165 | 0.00145 | 11.435 | 95281  | 29643 | 3970236 |
| PDAC4_Ra_Mo  | <i>P. theophrasti</i> | <i>P. reclinata</i>   | 0.0167 | 0.00145 | 11.572 | 80555  | 25567 | 3284569 |
| PDAC5_Ji_Mo  | <i>P. theophrasti</i> | <i>P. canariensis</i> | 0.0154 | 0.00134 | 11.518 | 83864  | 28432 | 3603358 |
| PDAC5_Ji_Mo  | <i>P. theophrasti</i> | <i>P. reclinata</i>   | 0.0155 | 0.00137 | 11.303 | 70616  | 24355 | 2988238 |
| PDAC6_Br_Mo  | <i>P. theophrasti</i> | <i>P. canariensis</i> | 0.0181 | 0.00171 | 10.587 | 95523  | 28385 | 3699658 |

|               |                       |                       |         |         |        |        |       |         |
|---------------|-----------------------|-----------------------|---------|---------|--------|--------|-------|---------|
| PDAC6_Br_Mo   | <i>P. theophrasti</i> | <i>P. reclinata</i>   | 0.0181  | 0.00168 | 10.769 | 80062  | 24574 | 3065333 |
| PDAC7_Az_Mo   | <i>P. theophrasti</i> | <i>P. canariensis</i> | 0.0182  | 0.00157 | 11.601 | 124884 | 35587 | 4919509 |
| PDAC7_Az_Mo   | <i>P. theophrasti</i> | <i>P. reclinata</i>   | 0.0183  | 0.00157 | 11.668 | 104657 | 30334 | 4050963 |
| PDAC8_Fa_Mo   | <i>P. theophrasti</i> | <i>P. canariensis</i> | 0.018   | 0.00139 | 13.01  | 120881 | 35091 | 4759397 |
| PDAC8_Fa_Mo   | <i>P. theophrasti</i> | <i>P. reclinata</i>   | 0.0183  | 0.00136 | 13.464 | 101908 | 30006 | 3922119 |
| PDAC807_Si_Eg | <i>P. theophrasti</i> | <i>P. canariensis</i> | 0.0058  | 0.00091 | 6.344  | 62908  | 35623 | 4729474 |
| PDAC807_Si_Eg | <i>P. theophrasti</i> | <i>P. reclinata</i>   | 0.0058  | 0.00088 | 6.62   | 52973  | 30217 | 3901541 |
| PDAC9_Bi_Mo   | <i>P. theophrasti</i> | <i>P. canariensis</i> | 0.0159  | 0.00153 | 10.422 | 116119 | 36340 | 5014741 |
| PDAC9_Bi_Mo   | <i>P. theophrasti</i> | <i>P. reclinata</i>   | 0.0158  | 0.00153 | 10.342 | 96697  | 31480 | 4126416 |
| Boaz          | <i>P. sylvestris</i>  | <i>P. canariensis</i> | -0.0053 | 0.00066 | -8.072 | 61877  | 89007 | 5079853 |
| Boaz          | <i>P. sylvestris</i>  | <i>P. reclinata</i>   | -0.0048 | 0.00055 | -8.732 | 49928  | 70034 | 4178168 |
| Adam          | <i>P. sylvestris</i>  | <i>P. canariensis</i> | -0.0025 | 0.00041 | -6.209 | 58779  | 71621 | 5079594 |
| Adam          | <i>P. sylvestris</i>  | <i>P. reclinata</i>   | -0.0025 | 0.0004  | -6.236 | 47174  | 57472 | 4177947 |
| Judith        | <i>P. sylvestris</i>  | <i>P. canariensis</i> | -0.0022 | 0.00046 | -4.762 | 60089  | 71308 | 5073895 |
| Judith        | <i>P. sylvestris</i>  | <i>P. reclinata</i>   | -0.002  | 0.00039 | -5.225 | 48438  | 56905 | 4173331 |
| Uriel         | <i>P. sylvestris</i>  | <i>P. canariensis</i> | -0.0032 | 0.00051 | -6.325 | 61493  | 77825 | 5079959 |
| Uriel         | <i>P. sylvestris</i>  | <i>P. reclinata</i>   | -0.0031 | 0.00048 | -6.419 | 49392  | 62216 | 4178250 |
| Jonah         | <i>P. sylvestris</i>  | <i>P. canariensis</i> | -0.0041 | 0.00051 | -7.973 | 61444  | 82147 | 5079865 |
| Jonah         | <i>P. sylvestris</i>  | <i>P. reclinata</i>   | -0.0037 | 0.00048 | -7.831 | 49584  | 65164 | 4178308 |
| Hannah        | <i>P. sylvestris</i>  | <i>P. canariensis</i> | -0.0006 | 0.00028 | -2.23  | 56458  | 59584 | 5081900 |
| Hannah        | <i>P. sylvestris</i>  | <i>P. reclinata</i>   | -0.0005 | 0.00025 | -1.97  | 45493  | 47562 | 4179885 |
| Methuselah    | <i>P. sylvestris</i>  | <i>P. canariensis</i> | 0.0002  | 0.00012 | 1.26   | 52785  | 52011 | 5037383 |
| Methuselah    | <i>P. sylvestris</i>  | <i>P. reclinata</i>   | 0.0002  | 0.00014 | 1.536  | 42365  | 41457 | 4144148 |
| PDAC1_Ka_Mo   | <i>P. sylvestris</i>  | <i>P. canariensis</i> | -0.007  | 0.0006  | -11.66 | 44547  | 68840 | 3489628 |
| PDAC1_Ka_Mo   | <i>P. sylvestris</i>  | <i>P. reclinata</i>   | -0.0064 | 0.00056 | -11.32 | 36435  | 54839 | 2890864 |
| PDAC10_Me_Mo  | <i>P. sylvestris</i>  | <i>P. canariensis</i> | -0.0062 | 0.00062 | -10.1  | 61780  | 92516 | 4925133 |
| PDAC10_Me_Mo  | <i>P. sylvestris</i>  | <i>P. reclinata</i>   | -0.006  | 0.00061 | -9.786 | 50065  | 74203 | 4055494 |
| PDAC11_Th_Mo  | <i>P. sylvestris</i>  | <i>P. canariensis</i> | -0.0078 | 0.00074 | -10.54 | 63350  | 1E+05 | 5007831 |
| PDAC11_Th_Mo  | <i>P. sylvestris</i>  | <i>P. reclinata</i>   | -0.0073 | 0.00064 | -11.44 | 50887  | 80897 | 4118770 |

|              |                      |                       |         |         |        |       |       |         |
|--------------|----------------------|-----------------------|---------|---------|--------|-------|-------|---------|
| PDAC12_Rh_Al | <i>P. sylvestris</i> | <i>P. canariensis</i> | -0.0048 | 0.00059 | -8.077 | 59912 | 83991 | 5023085 |
| PDAC12_Rh_Al | <i>P. sylvestris</i> | <i>P. reclinata</i>   | -0.0044 | 0.00052 | -8.472 | 48142 | 66195 | 4130804 |
| PDAC13_Dn_Tu | <i>P. sylvestris</i> | <i>P. canariensis</i> | -0.0049 | 0.00054 | -9.046 | 60882 | 85203 | 4992361 |
| PDAC13_Dn_Tu | <i>P. sylvestris</i> | <i>P. reclinata</i>   | -0.0046 | 0.00052 | -8.819 | 49380 | 68102 | 4105920 |
| PDAC14_Al_Tu | <i>P. sylvestris</i> | <i>P. canariensis</i> | -0.0076 | 0.00067 | -11.36 | 64436 | 1E+05 | 5005015 |
| PDAC14_Al_Tu | <i>P. sylvestris</i> | <i>P. reclinata</i>   | -0.0069 | 0.00058 | -11.8  | 52269 | 80637 | 4118769 |
| PDAC15_Bh_Tu | <i>P. sylvestris</i> | <i>P. canariensis</i> | -0.0091 | 0.00069 | -13.16 | 63839 | 1E+05 | 5020338 |
| PDAC15_Bh_Tu | <i>P. sylvestris</i> | <i>P. reclinata</i>   | -0.0085 | 0.00066 | -12.94 | 52005 | 87088 | 4131041 |
| PDAC17_Ab_Li | <i>P. sylvestris</i> | <i>P. canariensis</i> | -0.0071 | 0.00076 | -9.327 | 63861 | 99514 | 5003433 |
| PDAC17_Ab_Li | <i>P. sylvestris</i> | <i>P. reclinata</i>   | -0.0065 | 0.00074 | -8.809 | 52091 | 78921 | 4118648 |
| PDAC18-Ta_Li | <i>P. sylvestris</i> | <i>P. canariensis</i> | -0.0055 | 0.00059 | -9.369 | 64129 | 92132 | 5071185 |
| PDAC18-Ta_Li | <i>P. sylvestris</i> | <i>P. reclinata</i>   | -0.005  | 0.00055 | -9.077 | 52262 | 73053 | 4171518 |
| PDAC19_Ha_Eg | <i>P. sylvestris</i> | <i>P. canariensis</i> | -0.0045 | 0.00051 | -8.898 | 33114 | 43953 | 2383115 |
| PDAC19_Ha_Eg | <i>P. sylvestris</i> | <i>P. reclinata</i>   | -0.0042 | 0.00049 | -8.701 | 27062 | 35464 | 1984139 |
| PDAC2_Kh_Mo  | <i>P. sylvestris</i> | <i>P. canariensis</i> | -0.0079 | 0.00058 | -13.72 | 59509 | 97072 | 4731717 |
| PDAC2_Kh_Mo  | <i>P. sylvestris</i> | <i>P. reclinata</i>   | -0.0074 | 0.00055 | -13.45 | 48135 | 76955 | 3899769 |
| PDAC20_Ba_Eg | <i>P. sylvestris</i> | <i>P. canariensis</i> | -0.0043 | 0.00049 | -8.663 | 43312 | 57652 | 3361384 |
| PDAC20_Ba_Eg | <i>P. sylvestris</i> | <i>P. reclinata</i>   | -0.0041 | 0.0005  | -8.315 | 35056 | 46507 | 2784686 |
| PDAC21_Ha_Eg | <i>P. sylvestris</i> | <i>P. canariensis</i> | -0.0023 | 0.00047 | -4.833 | 58772 | 70390 | 5081915 |
| PDAC21_Ha_Eg | <i>P. sylvestris</i> | <i>P. reclinata</i>   | -0.002  | 0.00041 | -4.908 | 47278 | 55775 | 4179877 |
| PDAC22_Sa_Eg | <i>P. sylvestris</i> | <i>P. canariensis</i> | -0.0024 | 0.00049 | -4.952 | 59944 | 72373 | 5081261 |
| PDAC22_Sa_Eg | <i>P. sylvestris</i> | <i>P. reclinata</i>   | -0.0022 | 0.00046 | -4.754 | 48320 | 57396 | 4179351 |
| PDAC23_Sa_Eg | <i>P. sylvestris</i> | <i>P. canariensis</i> | -0.0021 | 0.00035 | -5.946 | 58323 | 68623 | 4944566 |
| PDAC23_Sa_Eg | <i>P. sylvestris</i> | <i>P. reclinata</i>   | -0.0019 | 0.00035 | -5.458 | 46868 | 54688 | 4064787 |
| PDAC24_Za_Eg | <i>P. sylvestris</i> | <i>P. canariensis</i> | -0.0025 | 0.00048 | -5.307 | 60528 | 73005 | 4935673 |
| PDAC24_Za_Eg | <i>P. sylvestris</i> | <i>P. reclinata</i>   | -0.0023 | 0.00043 | -5.448 | 48630 | 58122 | 4062022 |
| PDAC25_Ja_Su | <i>P. sylvestris</i> | <i>P. canariensis</i> | -0.0006 | 0.00026 | -2.138 | 60882 | 63667 | 5028384 |
| PDAC25_Ja_Su | <i>P. sylvestris</i> | <i>P. reclinata</i>   | -0.0003 | 0.00028 | -1.185 | 49048 | 50437 | 4138354 |
| PDAC3_Bk_Mo  | <i>P. sylvestris</i> | <i>P. canariensis</i> | -0.0057 | 0.00052 | -10.96 | 48891 | 72571 | 4121534 |

|               |                      |                       |         |         |        |       |       |         |
|---------------|----------------------|-----------------------|---------|---------|--------|-------|-------|---------|
| PDAC3_Bk_Mo   | <i>P. sylvestris</i> | <i>P. reclinata</i>   | -0.0054 | 0.00052 | -10.39 | 39871 | 58272 | 3408171 |
| PDAC4_Ra_Mo   | <i>P. sylvestris</i> | <i>P. canariensis</i> | -0.0065 | 0.0006  | -10.96 | 49594 | 75443 | 3962892 |
| PDAC4_Ra_Mo   | <i>P. sylvestris</i> | <i>P. reclinata</i>   | -0.006  | 0.00056 | -10.68 | 40228 | 59921 | 3278689 |
| PDAC5_Ji_Mo   | <i>P. sylvestris</i> | <i>P. canariensis</i> | -0.006  | 0.00054 | -11.06 | 47272 | 68915 | 3596629 |
| PDAC5_Ji_Mo   | <i>P. sylvestris</i> | <i>P. reclinata</i>   | -0.0055 | 0.00049 | -11.35 | 38429 | 54867 | 2982897 |
| PDAC6_Br_Mo   | <i>P. sylvestris</i> | <i>P. canariensis</i> | -0.0075 | 0.0007  | -10.58 | 47251 | 74770 | 3692735 |
| PDAC6_Br_Mo   | <i>P. sylvestris</i> | <i>P. reclinata</i>   | -0.0072 | 0.00071 | -10.2  | 38413 | 60503 | 3059850 |
| PDAC7_Az_Mo   | <i>P. sylvestris</i> | <i>P. canariensis</i> | -0.0072 | 0.00064 | -11.28 | 61335 | 96683 | 4911307 |
| PDAC7_Az_Mo   | <i>P. sylvestris</i> | <i>P. reclinata</i>   | -0.0067 | 0.00061 | -10.93 | 49655 | 76806 | 4044434 |
| PDAC8_Fa_Mo   | <i>P. sylvestris</i> | <i>P. canariensis</i> | -0.0074 | 0.0006  | -12.28 | 59039 | 94200 | 4751429 |
| PDAC8_Fa_Mo   | <i>P. sylvestris</i> | <i>P. reclinata</i>   | -0.0068 | 0.00059 | -11.57 | 47874 | 74419 | 3915788 |
| PDAC807_Si_Eg | <i>P. sylvestris</i> | <i>P. canariensis</i> | -0.0022 | 0.00035 | -6.077 | 56186 | 66338 | 4721397 |
| PDAC807_Si_Eg | <i>P. sylvestris</i> | <i>P. reclinata</i>   | -0.002  | 0.00036 | -5.472 | 45418 | 53066 | 3895120 |
| PDAC9_Bi_Mo   | <i>P. sylvestris</i> | <i>P. canariensis</i> | -0.0068 | 0.00072 | -9.483 | 61428 | 95413 | 5006443 |
| PDAC9_Bi_Mo   | <i>P. sylvestris</i> | <i>P. reclinata</i>   | -0.0066 | 0.00069 | -9.512 | 49435 | 76432 | 4119804 |

<sup>a</sup>The test was performed using *admixr* with the following tree, as stated in the Methods: (((W, X), Y), Z), where X is West Asian date palms; <sup>b</sup> $f_4$ -statistic value; <sup>c</sup>standard error of the  $f_4$ -statistic calculated using the block jackknife; <sup>d</sup>Z-score is the number of standard errors  $f_4$  is from 0; <sup>e</sup>BABA and ABBA are the counts of observed site patterns; <sup>f</sup>number of SNPs used for a given calculation

**Table S6. Summary of f3-statistics for testing of admixture in date palm and wild *Phoenix* species<sup>a</sup>**

| <b>C</b>     | <b>A</b>              | <b>B</b>              | <b><math>f_3^b</math></b> | <b>SE<sup>c</sup></b> | <b>Zs<sup>d</sup></b> | <b>Nsnps<sup>e</sup></b> |
|--------------|-----------------------|-----------------------|---------------------------|-----------------------|-----------------------|--------------------------|
| Adam         | <i>P. theophrasti</i> | West Asian date palms | -0.118809                 | 0.011043              | -10.759               | 2948922                  |
| Boaz         | <i>P. theophrasti</i> | West Asian date palms | -0.075744                 | 0.020792              | -3.643                | 2957757                  |
| Hannah       | <i>P. theophrasti</i> | West Asian date palms | -0.026978                 | 0.011471              | -2.352                | 2944442                  |
| Jonah        | <i>P. theophrasti</i> | West Asian date palms | -0.12681                  | 0.013453              | -9.426                | 2956696                  |
| Judith       | <i>P. theophrasti</i> | West Asian date palms | 0.005873                  | 0.020502              | 0.286                 | 2955779                  |
| Methuselah   | <i>P. theophrasti</i> | West Asian date palms | 0.046912                  | 0.016765              | 2.798                 | 2911108                  |
| Uriel        | <i>P. theophrasti</i> | West Asian date palms | 0.054206                  | 0.037589              | 1.442                 | 2952214                  |
| PDAC1_Ka_Mo  | <i>P. theophrasti</i> | West Asian date palms | -0.134801                 | 0.013852              | -9.732                | 2033698                  |
| PDAC10_Me_Mo | <i>P. theophrasti</i> | West Asian date palms | -0.129639                 | 0.014303              | -9.064                | 2873384                  |
| PDAC11_Th_Mo | <i>P. theophrasti</i> | West Asian date palms | -0.140723                 | 0.014361              | -9.799                | 2920402                  |
| PDAC12_Rh_Al | <i>P. theophrasti</i> | West Asian date palms | -0.169976                 | 0.011542              | -14.726               | 2921322                  |
| PDAC13_Dn_Tu | <i>P. theophrasti</i> | West Asian date palms | -0.135955                 | 0.010362              | -13.12                | 2909137                  |
| PDAC14_Al_Tu | <i>P. theophrasti</i> | West Asian date palms | -0.162077                 | 0.013148              | -12.327               | 2921781                  |
| PDAC15_Bh_Tu | <i>P. theophrasti</i> | West Asian date palms | -0.124935                 | 0.015689              | -7.963                | 2929982                  |
| PDAC17_Ab_Li | <i>P. theophrasti</i> | West Asian date palms | -0.107931                 | 0.016389              | -6.585                | 2917329                  |
| PDAC18-Ta_Li | <i>P. theophrasti</i> | West Asian date palms | -0.117694                 | 0.014638              | -8.04                 | 2955438                  |
| PDAC19_Ha_Eg | <i>P. theophrasti</i> | West Asian date palms | -0.155136                 | 0.01167               | -13.294               | 1430252                  |
| PDAC2_Kh_Mo  | <i>P. theophrasti</i> | West Asian date palms | -0.211745                 | 0.008194              | -25.842               | 2717214                  |
| PDAC20_Ba_Eg | <i>P. theophrasti</i> | West Asian date palms | -0.142667                 | 0.009484              | -15.042               | 1968998                  |
| PDAC21_Ha_Eg | <i>P. theophrasti</i> | West Asian date palms | -0.087003                 | 0.015923              | -5.464                | 2953964                  |
| PDAC22_Sa_Eg | <i>P. theophrasti</i> | West Asian date palms | -0.076366                 | 0.016754              | -4.558                | 2953428                  |
| PDAC23_Sa_Eg | <i>P. theophrasti</i> | West Asian date palms | -0.109542                 | 0.01066               | -10.276               | 2872522                  |
| PDAC24_Za_Eg | <i>P. theophrasti</i> | West Asian date palms | -0.074581                 | 0.013319              | -5.599                | 2867517                  |
| PDAC25_Ja_Su | <i>P. theophrasti</i> | West Asian date palms | 0.018337                  | 0.016889              | 1.086                 | 2919978                  |
| PDAC3_Bk_Mo  | <i>P. theophrasti</i> | West Asian date palms | -0.164486                 | 0.009228              | -17.825               | 2367784                  |
| PDAC4_Ra_Mo  | <i>P. theophrasti</i> | West Asian date palms | -0.197528                 | 0.008763              | -22.541               | 2292843                  |



|               |                       |                       |           |          |         |         |
|---------------|-----------------------|-----------------------|-----------|----------|---------|---------|
| PDAC5_Ji_Mo   | <i>P. theophrasti</i> | West Asian date palms | -0.19849  | 0.008755 | -22.673 | 2124227 |
| PDAC6_Br_Mo   | <i>P. theophrasti</i> | West Asian date palms | -0.110322 | 0.016178 | -6.819  | 2159712 |
| PDAC7_Az_Mo   | <i>P. theophrasti</i> | West Asian date palms | -0.151952 | 0.012602 | -12.058 | 2836570 |
| PDAC8_Fa_Mo   | <i>P. theophrasti</i> | West Asian date palms | -0.207316 | 0.007907 | -26.221 | 2734011 |
| PDAC807_Si_Eg | <i>P. theophrasti</i> | West Asian date palms | -0.112598 | 0.010501 | -10.723 | 2746996 |
| PDAC9_Bi_Mo   | <i>P. theophrasti</i> | West Asian date palms | -0.104555 | 0.016092 | -6.497  | 2906443 |
| Adam          | <i>P. sylvestris</i>  | West Asian date palms | -0.05265  | 0.005135 | -10.253 | 3124186 |
| Boaz          | <i>P. sylvestris</i>  | West Asian date palms | 0.071698  | 0.026447 | 2.711   | 3179383 |
| Hannah        | <i>P. sylvestris</i>  | West Asian date palms | -0.008484 | 0.008381 | -1.012  | 3069804 |
| Jonah         | <i>P. sylvestris</i>  | West Asian date palms | -0.028615 | 0.00697  | -4.105  | 3170817 |
| Judith        | <i>P. sylvestris</i>  | West Asian date palms | 0.068791  | 0.021151 | 3.252   | 3107096 |
| Methuselah    | <i>P. sylvestris</i>  | West Asian date palms | 0.043275  | 0.016461 | 2.629   | 3026272 |
| Uriel         | <i>P. sylvestris</i>  | West Asian date palms | 0.183267  | 0.039201 | 4.675   | 3148575 |
| PDAC1_Ka_Mo   | <i>P. sylvestris</i>  | West Asian date palms | 0.021545  | 0.012647 | 1.704   | 2212811 |
| PDAC10_Me_Mo  | <i>P. sylvestris</i>  | West Asian date palms | 0.022578  | 0.013815 | 1.634   | 3118448 |
| PDAC11_Th_Mo  | <i>P. sylvestris</i>  | West Asian date palms | 0.03244   | 0.011406 | 2.844   | 3197119 |
| PDAC12_Rh_Al  | <i>P. sylvestris</i>  | West Asian date palms | -0.06313  | 0.004377 | -14.422 | 3146971 |
| PDAC13_Dn_Tu  | <i>P. sylvestris</i>  | West Asian date palms | -0.026739 | 0.00685  | -3.904  | 3124169 |
| PDAC14_Al_Tu  | <i>P. sylvestris</i>  | West Asian date palms | 0.006835  | 0.011431 | 0.598   | 3195739 |
| PDAC15_Bh_Tu  | <i>P. sylvestris</i>  | West Asian date palms | 0.095536  | 0.019503 | 4.899   | 3209014 |
| PDAC17_Ab_Li  | <i>P. sylvestris</i>  | West Asian date palms | 0.075564  | 0.017165 | 4.402   | 3175060 |
| PDAC18-Ta_Li  | <i>P. sylvestris</i>  | West Asian date palms | 0.017681  | 0.011446 | 1.545   | 3191817 |
| PDAC19_Ha_Eg  | <i>P. sylvestris</i>  | West Asian date palms | -0.069187 | 0.007428 | -9.314  | 1523771 |
| PDAC2_Kh_Mo   | <i>P. sylvestris</i>  | West Asian date palms | -0.057152 | 0.005885 | -9.712  | 3025595 |
| PDAC20_Ba_Eg  | <i>P. sylvestris</i>  | West Asian date palms | -0.049062 | 0.006741 | -7.278  | 2108790 |
| PDAC21_Ha_Eg  | <i>P. sylvestris</i>  | West Asian date palms | -0.022291 | 0.00864  | -2.58   | 3119444 |
| PDAC22_Sa_Eg  | <i>P. sylvestris</i>  | West Asian date palms | -0.005994 | 0.009384 | -0.639  | 3123539 |
| PDAC23_Sa_Eg  | <i>P. sylvestris</i>  | West Asian date palms | -0.053893 | 0.005172 | -10.42  | 3029592 |
| PDAC24_Za_Eg  | <i>P. sylvestris</i>  | West Asian date palms | -0.002398 | 0.009172 | -0.261  | 3035641 |

|               |                      |                       |           |          |         |         |
|---------------|----------------------|-----------------------|-----------|----------|---------|---------|
| PDAC25_Ja_Su  | <i>P. sylvestris</i> | West Asian date palms | 0.042675  | 0.014878 | 2.868   | 3055285 |
| PDAC3_Bk_Mo   | <i>P. sylvestris</i> | West Asian date palms | -0.031818 | 0.009382 | -3.391  | 2578108 |
| PDAC4_Ra_Mo   | <i>P. sylvestris</i> | West Asian date palms | -0.073333 | 0.007768 | -9.44   | 2512705 |
| PDAC5_Ji_Mo   | <i>P. sylvestris</i> | West Asian date palms | -0.088485 | 0.003506 | -25.236 | 2304246 |
| PDAC6_Br_Mo   | <i>P. sylvestris</i> | West Asian date palms | 0.069742  | 0.017713 | 3.937   | 2344223 |
| PDAC7_Az_Mo   | <i>P. sylvestris</i> | West Asian date palms | 0.017106  | 0.014269 | 1.199   | 3106611 |
| PDAC8_Fa_Mo   | <i>P. sylvestris</i> | West Asian date palms | -0.068818 | 0.005554 | -12.392 | 3025843 |
| PDAC807_Si_Eg | <i>P. sylvestris</i> | West Asian date palms | -0.05672  | 0.005041 | -11.251 | 2897667 |
| PDAC9_Bi_Mo   | <i>P. sylvestris</i> | West Asian date palms | 0.069417  | 0.015541 | 4.467   | 3160929 |

<sup>a</sup>The test was performed using *admixr* to see if population C is an admixture of populations A and B; <sup>b</sup> $f_3$  statistic value; <sup>c</sup>standard error of the  $f_3$ -statistic calculated using the block jackknife; <sup>d</sup>Z-score is the number of standard errors  $f_3$  is from 0; <sup>e</sup>number of SNPs used for a given calculation

**Table S7. Summary of  $f_4$ -ratio statistics for inferring the proportion of *P. theophrasti* ancestry in the North African and Judean date palm genomes<sup>a</sup>**

| <b>X<sup>b</sup></b> | <b>O<sup>c</sup></b>  | <b><math>\alpha^d</math></b> | <b><math>1 - \alpha^e</math></b> | <b>SE<sup>f</sup></b> | <b>Zsc<sup>g</sup></b> |
|----------------------|-----------------------|------------------------------|----------------------------------|-----------------------|------------------------|
| Boaz                 | <i>P. canariensis</i> | 0.871112                     | 0.128888                         | 0.016107              | 54.084                 |
| Boaz                 | <i>P. reclinata</i>   | 0.872225                     | 0.127775                         | 0.01481               | 58.894                 |
| Adam                 | <i>P. canariensis</i> | 0.938934                     | 0.061066                         | 0.009558              | 98.24                  |
| Adam                 | <i>P. reclinata</i>   | 0.93449                      | 0.06551                          | 0.010168              | 91.906                 |
| Judith               | <i>P. canariensis</i> | 0.946642                     | 0.053358                         | 0.011221              | 84.364                 |
| Judith               | <i>P. reclinata</i>   | 0.946157                     | 0.053843                         | 0.010484              | 90.248                 |
| Uriel                | <i>P. canariensis</i> | 0.922431                     | 0.077569                         | 0.012408              | 74.34                  |
| Uriel                | <i>P. reclinata</i>   | 0.91851                      | 0.08149                          | 0.012768              | 71.937                 |
| Jonah                | <i>P. canariensis</i> | 0.90164                      | 0.09836                          | 0.012234              | 73.698                 |
| Jonah                | <i>P. reclinata</i>   | 0.900977                     | 0.099023                         | 0.012573              | 71.661                 |
| Hannah               | <i>P. canariensis</i> | 0.985159                     | 0.014841                         | 0.006643              | 148.301                |
| Hannah               | <i>P. reclinata</i>   | 0.986859                     | 0.013141                         | 0.00666               | 148.172                |
| Methuselah           | <i>P. canariensis</i> | 1.003711                     | -0.003711                        | 0.002945              | 340.851                |
| Methuselah           | <i>P. reclinata</i>   | 1.005817                     | -0.005817                        | 0.003791              | 265.336                |
| PDAC1_Ka_Mo          | <i>P. canariensis</i> | 0.832294                     | 0.167706                         | 0.013849              | 60.1                   |
| PDAC1_Ka_Mo          | <i>P. reclinata</i>   | 0.831107                     | 0.168893                         | 0.014261              | 58.277                 |
| PDAC10_Me_Mo         | <i>P. canariensis</i> | 0.8496                       | 0.1504                           | 0.014971              | 56.751                 |
| PDAC10_Me_Mo         | <i>P. reclinata</i>   | 0.842171                     | 0.157829                         | 0.015967              | 52.745                 |
| PDAC11_Th_Mo         | <i>P. canariensis</i> | 0.81172                      | 0.18828                          | 0.016909              | 48.006                 |
| PDAC11_Th_Mo         | <i>P. reclinata</i>   | 0.806423                     | 0.193577                         | 0.016201              | 49.778                 |
| PDAC12_Rh_Al         | <i>P. canariensis</i> | 0.884192                     | 0.115808                         | 0.013643              | 64.811                 |
| PDAC12_Rh_Al         | <i>P. reclinata</i>   | 0.883844                     | 0.116156                         | 0.013077              | 67.59                  |
| PDAC13_Dn_Tu         | <i>P. canariensis</i> | 0.882408                     | 0.117592                         | 0.012457              | 70.837                 |
| PDAC13_Dn_Tu         | <i>P. reclinata</i>   | 0.878829                     | 0.121171                         | 0.013275              | 66.204                 |
| PDAC14_Al_Tu         | <i>P. canariensis</i> | 0.816388                     | 0.183612                         | 0.016121              | 50.642                 |

|              |                       |          |          |          |         |
|--------------|-----------------------|----------|----------|----------|---------|
| PDAC14_Al_Tu | <i>P. reclinata</i>   | 0.81725  | 0.18275  | 0.015592 | 52.415  |
| PDAC15_Bh_Tu | <i>P. canariensis</i> | 0.779914 | 0.220086 | 0.016406 | 47.539  |
| PDAC15_Bh_Tu | <i>P. reclinata</i>   | 0.774489 | 0.225511 | 0.016841 | 45.989  |
| PDAC17_Ab_Li | <i>P. canariensis</i> | 0.827914 | 0.172086 | 0.018451 | 44.872  |
| PDAC17_Ab_Li | <i>P. reclinata</i>   | 0.826914 | 0.173086 | 0.019382 | 42.664  |
| PDAC18-Ta_Li | <i>P. canariensis</i> | 0.866673 | 0.133327 | 0.014163 | 61.191  |
| PDAC18-Ta_Li | <i>P. reclinata</i>   | 0.867587 | 0.132413 | 0.014354 | 60.444  |
| PDAC19_Ha_Eg | <i>P. canariensis</i> | 0.892389 | 0.107611 | 0.011477 | 77.753  |
| PDAC19_Ha_Eg | <i>P. reclinata</i>   | 0.889411 | 0.110589 | 0.012032 | 73.92   |
| PDAC2_Kh_Mo  | <i>P. canariensis</i> | 0.802281 | 0.197719 | 0.01443  | 55.598  |
| PDAC2_Kh_Mo  | <i>P. reclinata</i>   | 0.797359 | 0.202641 | 0.014839 | 53.733  |
| PDAC20_Ba_Eg | <i>P. canariensis</i> | 0.897229 | 0.102771 | 0.011674 | 76.859  |
| PDAC20_Ba_Eg | <i>P. reclinata</i>   | 0.890611 | 0.109389 | 0.012575 | 70.822  |
| PDAC21_Ha_Eg | <i>P. canariensis</i> | 0.944846 | 0.055154 | 0.01148  | 82.307  |
| PDAC21_Ha_Eg | <i>P. reclinata</i>   | 0.946027 | 0.053973 | 0.011035 | 85.729  |
| PDAC22_Sa_Eg | <i>P. canariensis</i> | 0.940975 | 0.059025 | 0.01193  | 78.876  |
| PDAC22_Sa_Eg | <i>P. reclinata</i>   | 0.942321 | 0.057679 | 0.012054 | 78.172  |
| PDAC23_Sa_Eg | <i>P. canariensis</i> | 0.949691 | 0.050309 | 0.008425 | 112.726 |
| PDAC23_Sa_Eg | <i>P. reclinata</i>   | 0.948842 | 0.051158 | 0.009243 | 102.652 |
| PDAC24_Za_Eg | <i>P. canariensis</i> | 0.939006 | 0.060994 | 0.011567 | 81.177  |
| PDAC24_Za_Eg | <i>P. reclinata</i>   | 0.938029 | 0.061971 | 0.011415 | 82.177  |
| PDAC25_Ja_Su | <i>P. canariensis</i> | 0.98664  | 0.01336  | 0.006269 | 157.391 |
| PDAC25_Ja_Su | <i>P. reclinata</i>   | 0.991066 | 0.008934 | 0.007534 | 131.544 |
| PDAC3_Bk_Mo  | <i>P. canariensis</i> | 0.859644 | 0.140356 | 0.012516 | 68.684  |
| PDAC3_Bk_Mo  | <i>P. reclinata</i>   | 0.854289 | 0.145711 | 0.013542 | 63.084  |
| PDAC4_Ra_Mo  | <i>P. canariensis</i> | 0.841218 | 0.158782 | 0.014    | 60.089  |
| PDAC4_Ra_Mo  | <i>P. reclinata</i>   | 0.838607 | 0.161393 | 0.014568 | 57.565  |
| PDAC5_Ji_Mo  | <i>P. canariensis</i> | 0.856681 | 0.143319 | 0.012422 | 68.967  |
| PDAC5_Ji_Mo  | <i>P. reclinata</i>   | 0.855472 | 0.144528 | 0.012141 | 70.461  |

|               |                       |          |          |          |         |
|---------------|-----------------------|----------|----------|----------|---------|
| PDAC6_Br_Mo   | <i>P. canariensis</i> | 0.821729 | 0.178271 | 0.016209 | 50.696  |
| PDAC6_Br_Mo   | <i>P. reclinata</i>   | 0.81079  | 0.18921  | 0.017619 | 46.018  |
| PDAC7_Az_Mo   | <i>P. canariensis</i> | 0.823104 | 0.176896 | 0.015826 | 52.01   |
| PDAC7_Az_Mo   | <i>P. reclinata</i>   | 0.818516 | 0.181484 | 0.016576 | 49.381  |
| PDAC8_Fa_Mo   | <i>P. canariensis</i> | 0.816507 | 0.183493 | 0.014251 | 57.293  |
| PDAC8_Fa_Mo   | <i>P. reclinata</i>   | 0.814917 | 0.185083 | 0.015288 | 53.304  |
| PDAC807_Si_Eg | <i>P. canariensis</i> | 0.948102 | 0.051898 | 0.008496 | 111.593 |
| PDAC807_Si_Eg | <i>P. reclinata</i>   | 0.947875 | 0.052125 | 0.009383 | 101.017 |
| PDAC9_Bi_Mo   | <i>P. canariensis</i> | 0.835152 | 0.164848 | 0.016573 | 50.393  |
| PDAC9_Bi_Mo   | <i>P. reclinata</i>   | 0.824877 | 0.175123 | 0.01753  | 47.055  |

<sup>a</sup>The ancestry proportion was estimated using *admixr*; <sup>b</sup>X is the focal individual whose ancestry we are testing (Judean date palm or North African variety); <sup>c</sup>outgroup species used; <sup>d</sup>proportion of West Asian date palm ancestry in the North African and Judean date palm genomes; <sup>e</sup>proportion of *P. theophrasti* ancestry; <sup>f</sup>standard error of the *f4*-ratio statistic calculated using the block jackknife; <sup>g</sup>Z-score is the number of standard errors the *f4*-ratio statistics is from 0

**Table S8. Genotypes of the Judean date palms at loci controlling fruit color (*VIR* locus) and sugar content (invertase genes region).**

| <i>Accession</i>  | <i>Genotype at the VIR locus</i>                      | <i>Genotype at the invertase genes region</i> |
|-------------------|-------------------------------------------------------|-----------------------------------------------|
| <i>Methuselah</i> | <i>VIR</i> <sup>+</sup> / <i>VIR</i> <sup>+</sup>     | No homozygote deletion                        |
| <i>Hannah</i>     | <i>vir</i> <sup>saf</sup> / <i>VIR</i> <sup>IM</sup>  | No homozygote deletion                        |
| <i>Adam</i>       | <i>VIR</i> <sup>+</sup> / <i>VIR</i> <sup>+</sup>     | No homozygote deletion                        |
| <i>Judith</i>     | <i>vir</i> <sup>saf</sup> / <i>vir</i> <sup>saf</sup> | No homozygote deletion                        |
| <i>Boaz</i>       | <i>VIR</i> <sup>+</sup> / <i>VIR</i> <sup>IM</sup>    | No homozygote deletion                        |
| <i>Jonah</i>      | <i>VIR</i> <sup>IM</sup> / <i>VIR</i> <sup>IM</sup>   | No homozygote deletion                        |
| <i>Uriel</i>      | <i>VIR</i> <sup>+</sup> / <i>VIR</i> <sup>+</sup>     | No homozygote deletion                        |

## Supplementary Information References

1. S. Sallon, *et al.*, Germination, genetics, and growth of an ancient date seed. *Science* (80-. ). **320**, 1464 (2008).
2. S. Sallon, *et al.*, Origins and insights into the historic Judean date palm based on genetic analysis of germinated ancient seeds and morphometric studies. *Sci. Adv.* **6**, 1–11 (2020).
3. K. M. Hazzouri, *et al.*, Whole genome re-sequencing of date palms yields insights into diversification of a fruit tree crop. *Nat. Commun.* **6**, 8824 (2015).
4. J. M. Flowers, *et al.*, Cross-species hybridization and the origin of North African date palms. *Proc. Natl. Acad. Sci. U. S. A.* **116**, 1651–1658 (2019).
5. M. Gros-Balthazard, *et al.*, The Discovery of Wild Date Palms in Oman Reveals a Complex Domestication History Involving Centers in the Middle East and Africa. *Curr. Biol.* **27**, 2211–2218 (2017).
6. M. Gros-Balthazard, *et al.*, Systematics and evolution of the genus *Phoenix*: towards understanding the date palm's origins. Preprint available at <https://www.researchgate.net/publication/342764851> (2020).
7. A. M. Bolger, M. Lohse, B. Usadel, Trimmomatic: A flexible trimmer for Illumina sequence data. *Bioinformatics* **30**, 2114–2120 (2014).
8. K. M. Hazzouri, *et al.*, Genome-wide association mapping of date palm fruit traits. *Nat. Commun.* **10**, 4680 (2019).
9. H. Li, Aligning sequence reads, clone sequences and assembly contigs with BWA-MEM. *arXiv*, 1303.3997 (2013).
10. A. Wysocker, K. Tibbetts, T. Fennell, Picard tools version 1.90. <http://picard.sourceforge.net> (2013).
11. H. Li, *et al.*, The Sequence Alignment/Map format and SAMtools. *Bioinformatics* **25**, 2078–2079 (2009).
12. A. McKenna, *et al.*, The Genome Analysis Toolkit: a MapReduce framework for analyzing next-generation DNA sequencing data. *Genome Res.* **20**, 1297–1303 (2010).
13. M. A. Depristo, *et al.*, A framework for variation discovery and genotyping using next-generation DNA sequencing data. *Nat. Genet.* **43**, 491–498 (2011).
14. R Core Team, R: A Language and Environment for Statistical Computing (2015).
15. W. M. Waterworth, G. E. Drury, C. M. Bray, C. E. West, Repairing breaks in the plant genome: The importance of keeping it together. *New Phytol.* **192**, 805–822 (2011).
16. D. H. Alexander, J. Novembre, K. Lange, Fast model-based estimation of ancestry in unrelated individuals. *Genome Res.* **19**, 1655–1664 (2009).
17. K. Luu, E. Bazin, M. G. B. Blum, pcadapt: an R package to perform genome scans for selection based on principal component analysis. *Mol. Ecol. Resour.* **17**, 67–77 (2017).
18. N. Duforet-Frebourg, E. Bazin, M. G. B. Blum, Genome scans for detecting footprints of local adaptation using a Bayesian factor model. *Mol. Biol. Evol.* **31**, 2483–2495 (2014).
19. N. Duforet-Frebourg, K. Luu, G. Laval, E. Bazin, M. G. B. Blum, Detecting genomic signatures of natural selection with principal component analysis: application to the 1000 Genomes data. *Mol. Biol. Evol.* **33**, 1082–1093 (2015).
20. A. M. Kozlov, *et al.*, RAxML-NG: A fast, scalable and user-friendly tool for maximum likelihood phylogenetic inference. *Bioinformatics* **35**, 4453–4455 (2019).
21. E. M. Ortiz, vcf2phylip v2.0: convert a VCF matrix into several matrix formats for phylogenetic analysis (2019) <https://doi.org/10.5281/zenodo.2540861>.

22. L. G. Wang, *et al.*, Treeio: An R Package for Phylogenetic Tree Input and Output with Richly Annotated and Associated Data. *Mol. Biol. Evol.* **37**, 599–603 (2020).
23. P. Danecek, *et al.*, The variant call format and VCFtools. *Bioinformatics* **27**, 2156–2158 (2011).
24. M. Petr, B. Vernot, J. Kelso, Admixr-R package for reproducible analyses using ADMIXTOOLS. *Bioinformatics* **35**, 3194–3195 (2019).
25. N. Patterson, *et al.*, Ancient admixture in human history. *Genetics* **192**, 1065–93 (2012).
26. R. E. Green, *et al.*, A draft sequence of the neandertal genome. *Science (80-. )*. **328**, 710–722 (2010).
27. B. K. Maples, S. Gravel, E. E. Kenny, C. D. Bustamante, RFMix: A discriminative modeling approach for rapid and robust local-ancestry inference. *Am. J. Hum. Genet.* **93**, 278–288 (2013).
28. S. R. Browning, B. L. Browning, Rapid and Accurate Haplotype Phasing and Missing-Data Inference for Whole-Genome Association Studies By Use of Localized Haplotype Clustering. *Am. J. Hum. Genet.* **81**, 1084–1097 (2007).
29. V. H. W. Dowson, A. Aten, *Dates, handling, processing and packing* (Rome : Food and Agriculture Organization of the United Nations, 1962).
